# Supplementary material for: Calcium Transients Closely Reflect Prolonged Action Potentials in iPSC Models of Inherited Cardiac Arrhythmia
Source: PubMed Central journal article supplement — Stem Cell Reports. 2014 Jul 4;3(2):269–81. doi: 10.1016/j.stemcr.2014.06.003 (PMC4175159; doi:10.1016/j.stemcr.2014.06.003), 2014-07-04
Supplement: mmc3.pdf [file mmc3.pdf]

## Calcium Transients Closely Reflect Prolonged Action Potentials in iPSC Models of Inherited Cardiac Arrhythmia

C. Ian Spencer,<sup>1,7</sup> Shiro Baba,<sup>1,2,7,8</sup> Kenta Nakamura,<sup>1,2,9</sup> Ethan A. Hua,<sup>1</sup> Marie A.F. Sears,<sup>1</sup> Chi-cheng Fu,<sup>1,5</sup> Jianhua Zhang,<sup>3</sup> Sadguna Balijepalli,<sup>3</sup> Kiichiro Tomoda,<sup>1</sup> Yohei Hayashi,<sup>1</sup> Paweena Lizarraga,<sup>1</sup> Julianne Wojciak,<sup>2</sup> Melvin M. Scheinman,<sup>2</sup> Katriina Aalto-Setälä,<sup>1,4</sup> Jonathan C. Makielski,<sup>3</sup> Craig T. January,<sup>3</sup> Kevin E. Healy,<sup>5</sup> Timothy J. Kamp,<sup>3</sup> Shinya Yamanaka,<sup>1,6</sup> and Bruce R. Conklin<sup>1,2,\*</sup>

<sup>1</sup>Gladstone Institute of Cardiovascular Disease, 1650 Owens Street, San Francisco, CA 94158, USA

<sup>2</sup>Departments of Medicine, Anatomy and Cellular and Molecular Pharmacology, University of California San Francisco, 500 Parnassus Avenue, San Francisco, CA 94143, USA

<sup>3</sup>Stem Cell and Regenerative Medicine Center, Cellular and Molecular Arrhythmia Research Program, University of Wisconsin School of Medicine and Public Health, 1111 Highland Avenue, Madison, WI 53792, USA

<sup>4</sup>Institute of Biomedical Technology, University of Tampere, Biokatu 12, 33520 Tampere, Finland

<sup>5</sup>Departments of Bioengineering, and Material Science and Engineering, University of California, Berkeley, CA 94720, USA

<sup>6</sup>Center for iPSC Cell Research and Application, Kyoto University, 53 Kawahara-cho, Shogoin, Sakyo-ku, Kyoto 606-8507, Japan

<sup>7</sup>Co-first author

<sup>8</sup>Present address: Department of Pediatrics, Kyoto University, Kyoto 606-8507, Japan

<sup>9</sup>Present address: Division of Cardiology, Massachusetts General Hospital, Harvard Medical School, Boston, MA 02114, USA

\*Correspondence: [bconklin@gladstone.ucsf.edu](mailto:bconklin@gladstone.ucsf.edu)

<http://dx.doi.org/10.1016/j.stemcr.2014.06.003>

This is an open access article under the CC BY-NC-ND license (<http://creativecommons.org/licenses/by-nc-nd/3.0/>).

### SUMMARY

Long-QT syndrome mutations can cause syncope and sudden death by prolonging the cardiac action potential (AP). Ion channels affected by mutations are various, and the influences of cellular calcium cycling on LQTS cardiac events are unknown. To better understand LQTS arrhythmias, we performed current-clamp and intracellular calcium ( $[Ca^{2+}]_i$ ) measurements on cardiomyocytes differentiated from patient-derived induced pluripotent stem cells (iPS-CM). In myocytes carrying an LQT2 mutation (HERG-A422T), APs and  $[Ca^{2+}]_i$  transients were prolonged in parallel. APs were abbreviated by nifedipine exposure and further lengthened upon releasing intracellularly stored  $Ca^{2+}$ . Validating this model, control iPS-CM treated with HERG-blocking drugs recapitulated the LQT2 phenotype. In LQT3 iPS-CM, expressing  $Na_v1.5$ -N406K, APs and  $[Ca^{2+}]_i$  transients were markedly prolonged. AP prolongation was sensitive to tetrodotoxin and to inhibiting  $Na^+$ - $Ca^{2+}$  exchange. These results suggest that LQTS mutations act partly on cytosolic  $Ca^{2+}$  cycling, potentially providing a basis for functionally targeted interventions regardless of the specific mutation site.

### INTRODUCTION

Seventy-five times per minute, cardiac action potentials (APs) propagate the opening and closing of multitudes of sarcolemmal ion channels. APs arise spontaneously in sinoatrial nodal cells, spreading through the myocardium in a sequence. Because APs are complex, they are vulnerable to ion channel dysfunctions, which often disrupt the heart rhythm and sometimes end in ventricular fibrillation and sudden death (Marbán, 2002).

One disorder resulting from ion-channel dysfunction, known as long-QT syndrome (LQTS), is characterized by abnormally long APs and a specific form of tachyarrhythmia, Torsade de pointes (TdP), that is precipitated by physiological triggers or by “torsadogenic” drugs. Inherited LQTS is considered rare but highly dangerous because the initial clinical presentation can be sudden death (Viskin, 1999). Physicians have difficulty treating LQTS for three principal reasons: (1) assessing the risk of cardiac events, even within the same family, is confounded because even the same mutation has differing severity in different people; (2) for some LQTS mutations, antiar-

rhythmic drugs with maintained effectiveness are lacking; and (3) the probability of TdP degenerating into ventricular fibrillation is quite low, creating uncertainty about preventative options. Underlying the incomplete penetrance of LQTS are both genetic and environmental factors (Bokil et al., 2010; Vincent, 2003). Consequently, because the triggering events—and treatments—for LQTS arrhythmias are mostly gene specific, there is an urgent need for novel methods of risk assessment (Bokil et al., 2010; Moss and Kass, 2005; Schwartz et al., 2001).

LQTS is usually diagnosed after unexplained syncopal (fainting) spells and is confirmed by electrocardiography that shows a prolonged QT interval (Jackman et al., 1990; Schwartz et al., 2001; Zareba et al., 1998). Because the QT interval represents a summation of all ventricular APs, LQTS mutations primarily affect ventricular ion channel complexes (Moss and Kass, 2005; Moss and Schwartz, 2005; Viskin, 1999). To date, the study of such mutations has centered on heterologous expression in nonmyocytes, but we can now exploit patient-derived induced pluripotent stem cells (iPSCs), offering opportunities to investigate LQTS mutations in native tissue (Bellin et al., 2013; Inoue

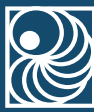

and Yamanaka, 2011; Itzhaki et al., 2011; Takahashi et al., 2007; Terrenoire et al., 2013).

Here, we used iPSCs to generate cardiomyocytes by reprogramming skin fibroblasts from two patients carrying dissimilar LQTS mutations. Associated with LQT2, HERG-A422T produces trafficking-defective HERG  $\text{K}^+$  channels ( $\text{K}_v$  11.1) that decrease the rapidly activating delayed rectifier current ( $\text{I}_{\text{Kr}}$ ), which is normally responsible for the bulk of ventricular repolarization. Conversely,  $\text{Na}_v$ 1.5-N406K produces a net gain of  $\text{Na}^+$  channel function, associated with LQT3. By simultaneously measuring membrane potential ( $E_m$ ) and intracellular free calcium ( $[\text{Ca}^{2+}]_i$ ) transients, we compared the phenotypes of cardiomyocytes expressing these mutations. Our studies revealed similarly remodeled APs, with recurrent early afterdepolarizations (EADs) mirrored by comparable changes in  $[\text{Ca}^{2+}]_i$  transients. Such findings may point to a  $\text{Ca}^{2+}$ -dependent, common arrhythmogenic mechanism, implying that a single therapeutic approach may be applicable to multiple forms of LQTS (Marban, 2002; Roden and Viswanathan, 2005; Viskin, 1999).

## RESULTS

### Fibroblasts, iPSCs, and Cardiomyocytes Reflect the Patient Genotype

Dermal fibroblasts from LQTS patients and control subjects were reprogrammed retrovirally into iPSCs (Inoue and Yamanaka, 2011). We subsequently directed their differentiation into cardiomyocytes (iPS-CM) by published methods (Takahashi et al., 2007; Zhang et al., 2012). The myocytes formed small groups of typically two to six cells, termed microclusters, that beat spontaneously. Antibody labeling and fluorescence microscopy showed that iPS-CM had protein-expression profiles consistent with a cardiac lineage, and DNA sequencing showed they carried the patient's LQTS mutations (Figures S1 and S2 available online). Two mutation-positive clones from each patient were studied in functional assays to accommodate insertional effects in DNA.

### Functional Characterization of Control and LQT2 iPS-CM

We verified that iPS-CM microclusters were functionally syncytial by observing that Fluo-4 fluorescence transients (taken to directly reflect  $[\text{Ca}^{2+}]_i$ ) in individual cells were practically identical around the microcluster and were synchronized at a short 10 ms resolution (Figure S3). From this, we posited that whole-microcluster  $[\text{Ca}^{2+}]_i$  transients (recorded by photomultiplier) could be correlated with APs recorded in any single, syncytial myocyte undergoing perforated patch clamp. By this convenient method, we

compared time courses of  $[\text{Ca}^{2+}]_i$  and  $E_m$  during spontaneous beating in control and LQTS myocytes.

Figure 1A (left) shows that in control iPS-CM subjected to perforated patch clamp, APs were quite brief ( $\text{APD}_{90}$ :  $548 \pm 55$  ms,  $n = 14$ ), maximum diastolic potential (MDP) was negative to  $-70$  mV ( $-72 \pm 1$  mV) and the maximum depolarization rate ( $V_{\text{max}}$ ) was brisk ( $45.5 \pm 5.5$  V/s). The spontaneous beating rhythm was regular, and  $[\text{Ca}^{2+}]_i$  transients were modestly longer than APs ( $\text{FTD}_{90}$ :  $759 \pm 59$  ms,  $p < 0.001$ ). In LQT2 myocytes, APs in many microclusters were markedly prolonged and had multiple EADs. Interestingly, the  $[\text{Ca}^{2+}]_i$  transients faithfully reflected this prolonged AP waveform (Figure 1A, center and right). Of the two LQT2 cell lines studied, clone A3 tended to have the longer APs and  $[\text{Ca}^{2+}]_i$  transients. In unpatched A4 microclusters (70% of which showed EADs), mean  $[\text{Ca}^{2+}]_i$  transient duration (at 90% amplitude) was  $1.71 \pm 0.31$  s ( $n = 10$ )—approximately double that of controls. Results are plotted in more detail for clone A3, because both APs and  $[\text{Ca}^{2+}]_i$  transients alike were prolonged more than an order of magnitude relative to control (Figure 1B). Even in single LQT2 (A3) myocytes, the shared trajectory of  $E_m$  and  $[\text{Ca}^{2+}]_i$  evoked sustained contractions (Figure 1C). In both LQT2 clones, the  $\text{I}_{\text{Kr}}$  density was about 50% of control (Figure 1D), consistent with the observed AP prolongation.

The foregoing results suggest that interactions between  $E_m$  and  $\text{Ca}^{2+}$ -dependent mechanisms might further prolong the APD when  $\text{I}_{\text{Kr}}$  density is diminished. We therefore examined the APD changes associated with blocking sarcolemmal L-type  $\text{Ca}^{2+}$  channels, because  $\text{I}_{\text{Kr}}$  tends to oppose depolarizing  $\text{Ca}^{2+}$  current ( $\text{I}_{\text{Ca}}$ ), especially late in the AP. Within 30 s of being exposed to 2  $\mu\text{M}$  nifedipine, control APs were severely abbreviated (and beating ceased) consistent with  $\text{I}_{\text{Ca}}$  being the principal source of myocyte  $\text{Ca}^{2+}$  influx (Figure 2A). After the last AP, automaticity failed to trigger an AP upstroke (Figure 2Aii), and  $E_m$  was typically approximately  $-60$  mV until 30 s after nifedipine was washed out (Figure 2Aiii). As in controls, exposing LQT2 (A3) iPS-CM to nifedipine abbreviated the APs, despite the  $\text{I}_{\text{Kr}}$  deficit (Figure 2B). However, whereas about 10% (2/19) of LQT2 microclusters stopped beating, most continued for at least 1 min, unless they were silenced by applying tetrodotoxin (TTX) to block  $\text{Na}^+$  channels (Figures 2C and 2D). In LQT3 iPS-CM, we observed similar results to controls, where nifedipine caused AP shortening and arrested beating (Figure S4C). The more sustained automaticity in nifedipine-treated LQT2 iPS-CM may reflect a specific genetic process in that individual, or perhaps compensatory automaticity unmasked by the  $\text{I}_{\text{Kr}}$  insufficiency (Itzhaki et al., 2011; Xi et al., 2010).

When a cardiac AP is triggered,  $\text{I}_{\text{Ca}}$  evokes a  $[\text{Ca}^{2+}]_i$  transient via  $\text{Ca}^{2+}$ -induced  $\text{Ca}^{2+}$  release (CICR) from the

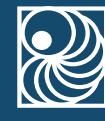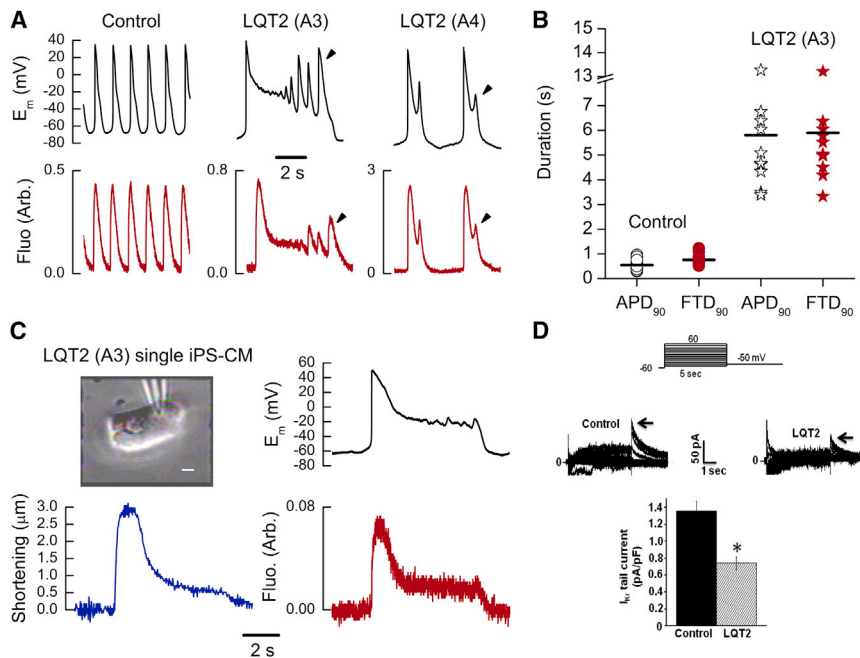

### Figure 1. Electrophysiological Phenotypes in Control and LQT2 iPS-CM

(A) Upper: spontaneous APs ( $E_m$ ) recorded from representative control iPS-CM and the two clones of LQT2 (as labeled). Lower: simultaneously recorded  $[Ca^{2+}]_i$  transients (red) in arbitrary units (Fluo). Y axes refer to all traces to the right, and the timescale bar refers to all traces. Arrowheads point to EADs.

(B) Mean APD<sub>90</sub> and simultaneously acquired FTD<sub>90</sub> from control and LQT2 (A3) microclusters. Grand mean values represented by horizontal lines were: control, APD<sub>90</sub> 0.55 ± 0.05 s and FTD<sub>90</sub> 0.76 ± 0.06 s (n = 14); LQT2, APD<sub>90</sub> 5.80 ± 0.90 s (p < 0.001 versus control) and FTD<sub>90</sub> 5.89 ± 0.86 s, (p < 0.001 versus control) (n = 10). (C) Left, top: photomicrograph of a single LQT2 (A3) iPS-CM (with patch pipette), scale bar, 10 μm. Clockwise from top right: AP from the same myocyte;  $[Ca^{2+}]_i$  transient (red); cell shortening (blue trace). The signal durations coincided: APD<sub>90</sub> =

6.89 s; FTD<sub>90</sub> = 6.89 s; and mechanical transient duration at 90% relaxation (MTD<sub>90</sub>) = 7.01 s.

(D) Representative families of E-4031-sensitive  $I_{Kr}$  tail currents (arrows) in control and LQT2 (A4) iPS-CM, and voltage protocol shown above. The histogram represents peak  $I_{Kr}$  tail-current densities for control (n = 8), and both LQT2 clones, pooled (n = 19, \*p < 0.05). Error bars (SEM).

sarcoplasmic reticulum (SR). To model how CICR affects AP prolongation, we also used 10 mM caffeine to rapidly release SR-stored  $Ca^{2+}$  into the cytoplasm. In control microclusters (and in LQT2), we found that sustained caffeine applications tonically elevated  $[Ca^{2+}]_i$ , but inhibited beating (Figure S4A). Therefore, we employed caffeine “puffs” to modify  $[Ca^{2+}]_i$  transients only briefly.

In LQT2 (A4) iPS-CM with modestly prolonged APs, applying a caffeine puff in diastole (i.e., after repolarization) triggered an AP (Figures 3A and 3B, left and center). The triggered AP and  $[Ca^{2+}]_i$  transient lasted as long as the caffeine exposure (6 s), regardless of the prior spontaneous APD, and the AP lacked prominent EADs (arrow). Applying caffeine during an ongoing AP (Figures 3A and 3B, right) increased  $[Ca^{2+}]_i$  and resulted in further depolarization (arrow), likely due to electrogenic  $Na^+$ - $Ca^{2+}$  exchange (NCX) (Eisner et al., 1998). Scaled APs and  $[Ca^{2+}]_i$  transients closely matched in time course, even after caffeine washout (Figure 3C, arrows), and the durations of APs affected by caffeine were markedly prolonged (Figure 3D). Further investigation by  $Ca^{2+}$  imaging showed that prolonged spontaneous and caffeine-evoked  $[Ca^{2+}]_i$  transients occurred simultaneously in each cell of an LQT2 microcluster (Figure 4). Interestingly, spontaneous  $[Ca^{2+}]_i$  transients were also temporarily abbreviated just after caffeine-induced release of SR  $Ca^{2+}$ , potentially indi-

cating a beat-by-beat feedback of cytosolic  $Ca^{2+}$  on  $E_m$ , modulated by  $Ca^{2+}$  extrusion.

To check whether  $[Ca^{2+}]_i$  transients and APs were always prolonged together, we exposed control iPS-CM to the  $I_{Kr}$  blocker E-4031 (0.5 μM). With an increasing duration of E-4031 exposure, APs and  $[Ca^{2+}]_i$  transients became longer and EADs began to occur, closely mimicking LQT2 (Figures 5A and 5B). APD<sub>90</sub> and FTD<sub>90</sub> were strongly correlated, and the beating rate progressively decreased, indicating that blocking  $I_{Kr}$  influenced automaticity (Figures 5B and S4B). To be sure that the effects of E-4031 were due to selective HERG channel block, we then exposed control iPS-CM to 10 μM cisapride, which has a distinct mode of action on  $I_{Kr}$  (Kamiya et al., 2008). This agent also dramatically prolonged the  $[Ca^{2+}]_i$  transients, altering the waveform to resemble LQT2 and that observed under E-4031 (Figure 5C).

### Gain of Function in LQT3 iPS-CM

In LQT3, APs are prolonged by increased inward  $Na^+$  current, often late in a depolarization ( $I_{Na,L}$ ), rather than by  $K^+$  channel depopulation (Terrenoire et al., 2013). Nonetheless, in both LQT3 iPS-CM clones studied, the APs and  $[Ca^{2+}]_i$  transients were prolonged together, analogous to our findings in LQT2 iPS-CM (Figure 6A). Between clones A1 and A3, the degree of AP prolongation was similar,

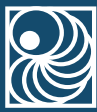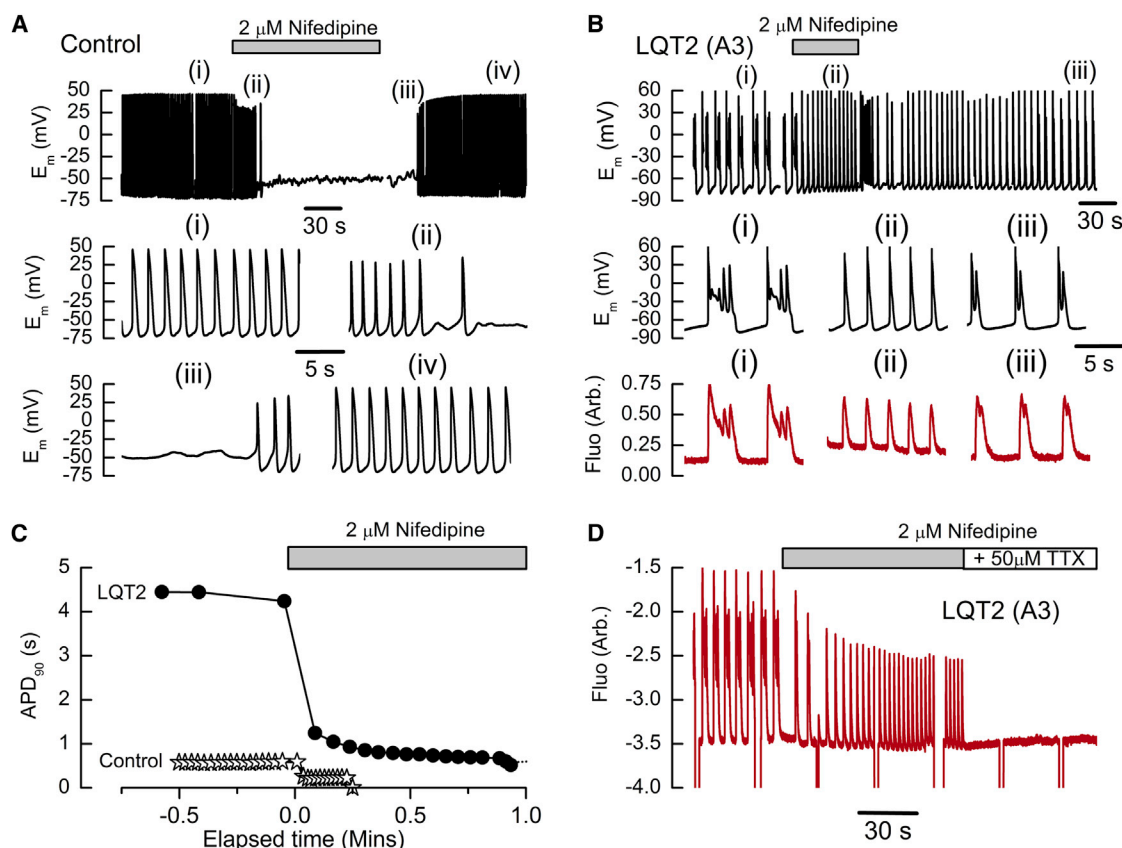

**Figure 2. Effects of the  $\text{Ca}^{2+}$  Antagonist Nifedipine on Spontaneous APs and  $[\text{Ca}^{2+}]_i$  Transients in Control and LQT2 iPS-CM**

(A) Upper panel, time course of APs ( $E_m$ ) during superfusion with nifedipine (gray bar) in a representative control iPS-CM microcluster, with numerals to indicate regions of interest (ROI). Center and lower panels: labeled ROI shown on an expanded scale.

(B) Upper and center panels, equivalent plots to (A), from a representative LQT2 iPS-CM cluster. Note the increase in beating rate during nifedipine exposure (gray bar). Lower panel,  $[\text{Ca}^{2+}]_i$  transients (red, labeled Fluo, in arbitrary units) from ROI indicated by numerals above.

(C)  $\text{APD}_{90}$  in (A) and (B) plotted against elapsed time, defined by assigning the point of nifedipine addition (gray bar) to time zero. (Control responses occurred at negative values of elapsed time.) Note that, in the LQT2 microcluster, nifedipine reduced  $\text{APD}_{90}$  by 84% (to  $0.71 \pm 0.01$  s), which was still longer than mean pre-nifedipine  $\text{APD}_{90}$  in the control microcluster.

(D) Changes in  $[\text{Ca}^{2+}]_i$  transients (Fluo, in arbitrary units; red trace) when an unpatched LQT2 microcluster was exposed to  $2 \mu\text{M}$  nifedipine (gray bar), followed by  $50 \mu\text{M}$  tetrodotoxin (TTX) in the continued presence of nifedipine (white bar), which arrested beating. Downward trace steps represent the blocking of excitation light by the shutter.

and the relationship between  $\text{APD}_{90}$  and  $\text{FTD}_{90}$  obeyed a single linear relation (Figure 6B). For whole-cell patched LQT3 (A3) cells, where the cytosol was dialyzed with  $0.1 \text{ mM}$  EGTA to eliminate Fluo-4 dye (Figure 6C, right),  $\text{APD}_{90}$  was prolonged 14-fold relative to control ( $p = 0.006$ ). Data from perforated patched myocytes were similar (center), but with shorter mean APD because somewhat fewer APs exceeded 10 s in duration.

LQT3 APs and  $[\text{Ca}^{2+}]_i$  transients often incorporated long trains of EADs, causing oscillating contractions, possibly reflecting a more severe pathology (Movie S1). We therefore set out to isolate specific effects of N406K channels on APD by using the selective  $\text{Na}^+$  channel blocker tetrodotoxin (TTX), to which  $I_{\text{Na,L}}$  is highly sensitive (Sakmann

et al., 2000; Wu et al., 2009). In control microclusters, inhibiting  $I_{\text{Na}}$  with  $50 \mu\text{M}$  TTX slightly affected the beating rate and AP morphology but did not significantly shorten the mean  $\text{APD}_{90}$  (Figure 6D). Moreover, in the presence of TTX, diastolic intervals shortened progressively (after an initial long pause), whereas the peak depolarization rate in the AP upstroke ( $V_{\text{max}}$ ) continued to be depressed (beating was later abolished by adding  $2 \mu\text{M}$  nifedipine). Although TTX reduced  $V_{\text{max}}$  in LQT3 (A3) microclusters, it also abbreviated  $\text{APD}_{90}$  (Figure 6E). During exposure to  $1 \mu\text{M}$  TTX, mean  $\text{APD}_{90}$  dropped significantly from  $9.79 \pm 4.03$  to  $6.30 \pm 3.54$  s ( $p = 0.003$ ,  $n = 9$ ) and  $V_{\text{max}}$  fell from  $54.6 \pm 11.3$  to  $33.9 \pm 8.3$  V/s ( $p = 0.006$ ). In response to  $50 \mu\text{M}$  TTX, mean  $\text{APD}_{90}$  decreased even more, from



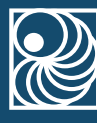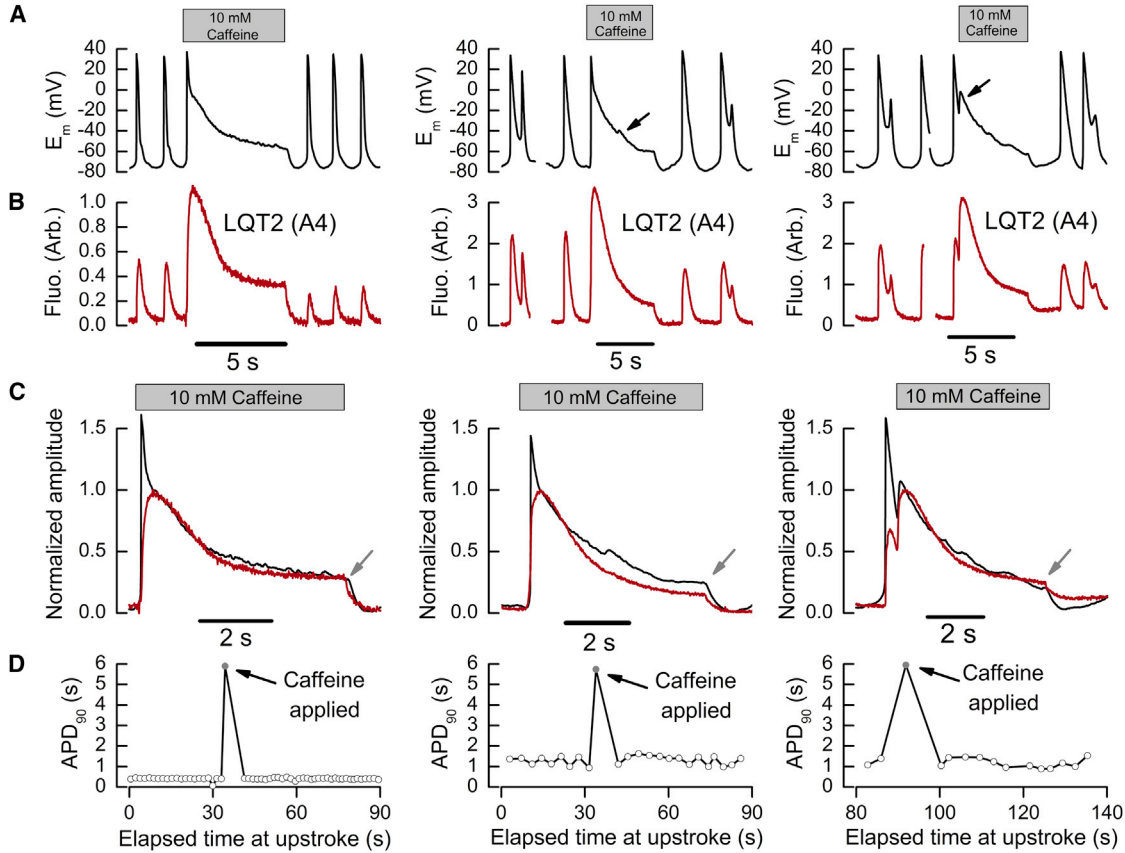

**Figure 3. LQT2 AP Profiles Were Influenced by  $[\text{Ca}^{2+}]_i$  Transients Stimulated by Caffeine-Induced SR  $\text{Ca}^{2+}$  Release**

(A) LQT2 (A4) APs ( $E_m$ ) with slight initial AP prolongation (left) or modest AP prolongation (center and right), before, during, and after the applications of 10 mM caffeine (gray bars). Caffeine was applied in diastole (left, center) or during the ongoing AP (right). Arrows highlight EADs.

(B) The  $[\text{Ca}^{2+}]_i$  transients (red, in arbitrary units) associated with the APs of (A); gaps in the traces indicate shutter closings.

(C) Overlays of Fluo-4 fluorescence, normalized to the caffeine-induced peak and  $E_m$  divided by its value at the same time point (peak of caffeine-induced  $[\text{Ca}^{2+}]_i$  transient). Graphs were produced from traces in (A) and (B). Gray arrows indicate caffeine washout.

(D)  $\text{APD}_{90}$  determined beat-by-beat for the entire experiments of (A). Points corresponding to APs affected by caffeine are shown in gray.

$6.65 \pm 1.69$  to  $2.08 \pm 0.68$  s ( $p = 0.008$ ,  $n = 7$ ), and  $V_{\max}$ , decreased from  $50.3 \pm 12.7$  to  $13.6 \pm 1.1$  V/s ( $p = 0.023$ ). Because high doses of TTX eliminate  $I_{\text{Na},L}$ , the shortened APs reveal the gain-of-function in N406K channels. Nonetheless, 50  $\mu\text{M}$  TTX only partially returned LQT3 APs to a duration comparable with control iPS-CM, so direct depolarization by mutant  $\text{Na}^+$  channels could only account for part of the observed APD. Moreover, EADs continued to occur while LQT3 myocytes were exposed to 50  $\mu\text{M}$  TTX (Figure 6E, inset) suggesting that  $I_{\text{Ca}}$  and  $[\text{Ca}^{2+}]_i$  also participated in the LQT3 phenotype. Consistent with this, under voltage clamp, TTX-sensitive  $I_{\text{Na},L}$  was  $\sim 35\%$  of the total late inward current observed during 500 ms at  $-10$  mV, whereas the remaining current was nifedipine sensitive (Figure S5). Furthermore,  $V_{\max}$  calculated for EADs was  $<10$  V/s (analogous to the  $V_{\max}$  of AP upstrokes recorded

with 50  $\mu\text{M}$  TTX present), suggesting that  $I_{\text{Na}}$  was largely unavailable during the prolonged AP plateau (Figure S6).

In a previous study in rodent ventricular myocytes, we used blockers to demonstrate that NCX functionally links  $[\text{Ca}^{2+}]_i$  and APD (Spencer and Sham, 2003). We therefore used a similar approach to investigate the phenotype of LQT3 iPS-CM. First, we confirmed that caffeine-induced increases in  $[\text{Ca}^{2+}]_i$  prolonged the APD (in both LQT3 clones) as in LQT2 (Figure 7A). Caffeine puffs were also used to demonstrate inward NCX current ( $I_{\text{NCX}}$ ) explicitly, under voltage clamp (Figure 7B). Interestingly, when  $I_{\text{NCX}}$  was blocked with LiCl at different times during an ongoing AP, the AP was rapidly terminated and automaticity halted (Figures 7C and S4D).  $E_m$  was hyperpolarized below the preceding MDP, and  $[\text{Ca}^{2+}]_i$  was elevated above the usual diastolic level. Both control and LQT2 iPS-CM exposed to

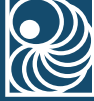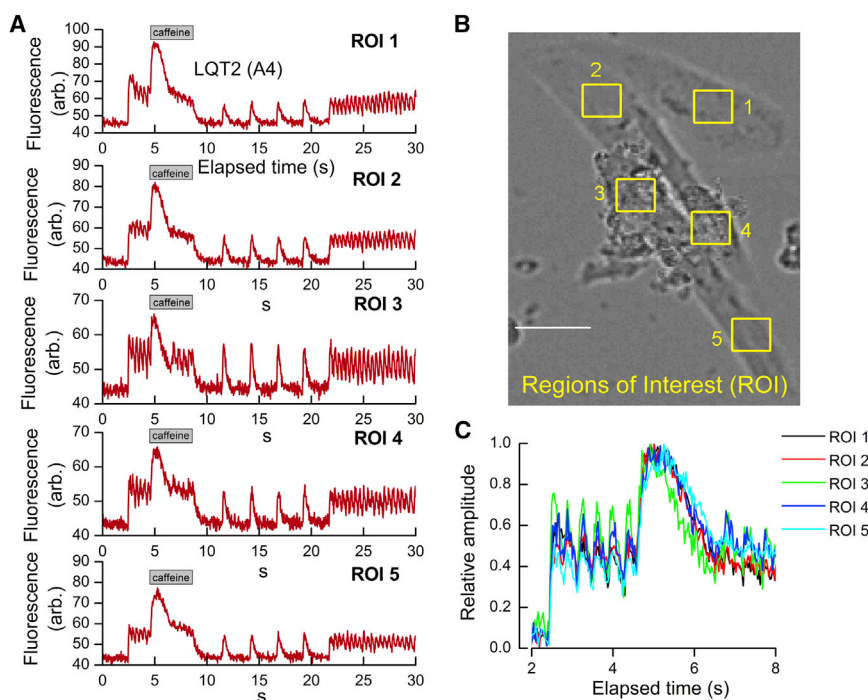

**Figure 4. Comparing Spontaneous and Caffeine-Evoked [Ca<sup>2+</sup>]<sub>i</sub> Transients in Individual Myocytes in an LQT2 Microcluster**

(A) Fluo-4 fluorescence averaged in small, numbered regions of interest (ROIs) each within a myocyte of an LQT2 microcluster, plotted (top to bottom) versus time in the videomicrograph. During the time indicated by the gray bar, 10 mM caffeine was added to the superfusion solution.

(B) The numbered ROIs in which fluorescence was averaged (yellow rectangles) superimposed on a transmitted light image of the microcluster (scale bar, 50 μm).

(C) Overlaid time courses for each ROI at 30 ms resolution (33 frames/s in the videomicrograph). The rising phase of both spontaneous and caffeine-evoked [Ca<sup>2+</sup>]<sub>i</sub> transients superimposed completely. Similar results were obtained from five different LQT2 microclusters.

LiCl exhibited similarly elevated diastolic [Ca<sup>2+</sup>]<sub>i</sub> (not shown). For LQT3 cells, whose mean MDP was  $-86 \pm 2$  mV ( $n = 8$ ), significant hyperpolarization to  $-93 \pm 1$  mV ( $p = 0.002$ ) occurred when LiCl was applied. LiCl washout abolished the hyperpolarization, allowing beating to restart. Occasionally at this point, a delay occurred revealing the restarting of [Ca<sup>2+</sup>]<sub>i</sub> transient decay (previously stalled) ahead of the upstroke of the next AP (Figure 7D, dotted line). To investigate further if hyperpolarization occurred because extracellular Li<sup>+</sup> caused NCX to reverse (with Ca<sup>2+</sup> influx and Na<sup>+</sup> efflux), the experiment was repeated after omitting Ca<sup>2+</sup> from the Li<sup>+</sup>-containing solution (Figure 7E). In the nominal absence of both forward and reverse exchange, we observed that diastolic [Ca<sup>2+</sup>]<sub>i</sub> was still elevated, and E<sub>m</sub> was hyperpolarized from  $-79 \pm 2$  mV ( $n = 7$ ) to  $-88 \pm 1$  mV ( $p = 0.004$ ), eliminating NCX as the primary driver of these changes. Premature AP termination by Ca<sup>2+</sup>-free Li<sup>+</sup>-containing solution was associated invariably with considerable prolongation of the next spontaneous AP after returning to control Tyrode's, indicating the retention of releasable Ca<sup>2+</sup> in the SR. Conversely, when SR Ca<sup>2+</sup> reuptake was inhibited using 50 μM cyclopiazonic acid (CPA), a reversible blocker of the SR Ca<sup>2+</sup> ATPase (SERCA), the prolonged lifetime of cytosolic Ca<sup>2+</sup> could extend the AP essentially indefinitely, with occasional EADs, terminated by CPA washout (Figure 7F). These results suggest that cyclical shuttling of Ca<sup>2+</sup> ions across the sarcolemma into the cell via I<sub>Ca</sub> and out via NCX—with both processes producing depolarizing inward

current—could contribute to the duration of APs affected by LQTS mutations (even in the absence of CPA).

## DISCUSSION

This investigation focused on identifying potential mechanisms underlying LQT arrhythmias as recapitulated in myocytes generated from patient-derived iPS cells. The results complement recent investigations showing that LQTS phenotypes can be produced in human stem cell-derived myocytes (Bellin et al., 2013; Davis et al., 2012; Itzhaki et al., 2011; Lahti et al., 2012; Terrenoire et al., 2013). Although arrhythmogenic triggers are recognized to be gene related, prolonged APs are the common denominator in LQTS diseases (Schwartz et al., 2001). Our results suggest that prolonged APs may promote arrhythmia, at least partially, through Ca<sup>2+</sup>-dependent mechanisms.

Though similarities in profile between the AP and [Ca<sup>2+</sup>]<sub>i</sub> transient waveforms might not necessarily indicate a causal relationship, the results suggest that E<sub>m</sub> is influenced by three major Ca<sup>2+</sup>-dependent mechanisms in combination. First, blocking I<sub>Ca</sub> strongly abbreviated the APs in LQT2 iPS-CM, even though AP prolongation had arisen from I<sub>Kr</sub> deficiency. We attribute this to the normal presence of a sustained direct depolarization by I<sub>Ca</sub>, and inward I<sub>NCX</sub> during the triggered [Ca<sup>2+</sup>]<sub>i</sub> transient (Eisner et al., 1998; Linz and Meyer, 2000; Spencer and Sham, 2003). Second, stimulating SR Ca<sup>2+</sup> release (with caffeine) during an

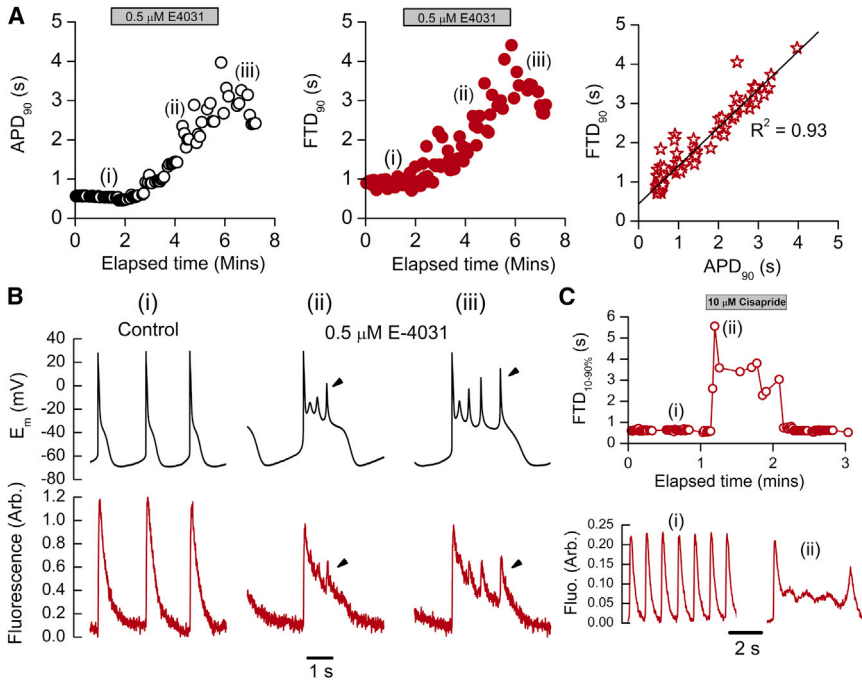

**Figure 5. Control Action Potentials and  $[\text{Ca}^{2+}]_i$  Transients Were Prolonged by HERG Blockers**

(A) Left:  $\text{APD}_{90}$  in a representative control microcluster plotted against elapsed time, before and after adding  $0.5 \mu\text{M}$  E-4031 to the superfusion solution (gray bar). Center: equivalent plot of  $\text{FTD}_{90}$  (in the same microcluster). Numerals identify individual traces shown in more detail below. Right:  $\text{FTD}_{90}$  (from center panel) assigned to the dependent variable and plotted against  $\text{APD}_{90}$  (left panel). For the linear fit: slope =  $0.97 \pm 0.03$ , intercept =  $437.64 \pm 38.51 \text{ ms}$ ,  $R^2 = 0.93$ .

(B) Individual APs ( $E_m$ , upper panels) and  $[\text{Ca}^{2+}]_i$  transients (red traces in lower panels) denoted by numerals in part (A). These ROI consisted of (i) before exposure to E-4031; (ii) midway; and (iii) at maximal AP prolongation. Arrowheads indicate EADs.

(C) Plot of  $[\text{Ca}^{2+}]_i$  transient duration ( $\text{FTD}$  at 10%–90%) versus elapsed time during an experiment where a control iPS-CM micro-

cluster was exposed to  $10 \mu\text{M}$  cisapride, a rapidly reversible HERG blocker. Individual, numbered  $[\text{Ca}^{2+}]_i$  transients are displayed below. Mean duration increased about 10-fold during cisapride treatment (representative of six microclusters).

ongoing AP prolonged its duration, with the resulting AP reflecting the  $[\text{Ca}^{2+}]_i$  waveform, and blocking SR  $\text{Ca}^{2+}$  reuptake (via SERCA) prolonged both APs and  $[\text{Ca}^{2+}]_i$  transients markedly. Thus, our findings support an established mechanism whereby a portion of released  $\text{Ca}^{2+}$  is extruded, generating inward  $I_{\text{NCX}}$  and thereby reactivating  $I_{\text{Ca}}$  and causing EADs (January et al., 1991; January and Riddle, 1989; Makielski and January, 1998). SR  $\text{Ca}^{2+}$  reuptake facilitates further cyclic  $\text{Ca}^{2+}$  releases during EADs, particularly when  $E_m$  changes are relatively undamped by repolarizing currents—as in LQTS—(Figures S6E and S7). Third, in the presence of LiCl, cytosolic  $\text{Ca}^{2+}$  appeared to equilibrate between the SR and cellular buffers, made evident by the failure of  $[\text{Ca}^{2+}]_i$  to return to baseline despite membrane hyperpolarization possibly aided by limited  $\text{Li}^+$ - $\text{Ca}^{2+}$  exchange (Doering et al., 1998). When not blocked by LiCl, forward NCX would likely extrude this  $\text{Ca}^{2+}$  load as part of automaticity (Zahanich et al., 2011). Indeed, depleting SR  $\text{Ca}^{2+}$  by caffeine applications briefly reset spontaneous LQT2  $[\text{Ca}^{2+}]_i$  transients to a shorter duration (Figure 4A). In both LQT2 and LQT3, the occasional prolongation of APs and  $\text{Ca}^{2+}$  transients out to tens of seconds also implies that mechanisms underlying the refractoriness and restitution of SR  $\text{Ca}^{2+}$  release are readily overridden in iPS-CM (Sobie et al., 2006). Taken together, our results show that in human LQTS myocytes (rather than drug-induced LQTS in animal models)  $\text{Ca}^{2+}$  handling is involved in prolonging

the AP, regardless of the initiating mutation. Although we encourage additional studies examining a wider range of LQTS mutations, our results suggest that antiarrhythmic treatments for LQTS could target cellular  $\text{Ca}^{2+}$  cycling, with the benefit of being genotype independent.

Safe  $\text{Ca}^{2+}$  antagonists are already used clinically, and convincing (albeit limited) evidence supports their use in LQTS diseases that resist conventional pharmacotherapy (Iseri and French, 1984; Jackman et al., 1990; Komiya et al., 2004). However, physicians appear hesitant to prescribe  $\text{Ca}^{2+}$  antagonists in LQTS for fear of triggering vasodilation, bradycardia, and further arrhythmias. Conversely, evidence from animal models favors these agents (Baillie et al., 1988; Guo et al., 2007; Thomas et al., 2007; Yamada et al., 2008). One study suggested that mere 5 mV shifts in  $I_{\text{Ca}}$  activation or inactivation voltage might abolish EADs (Madhvani et al., 2011). Direct injection of  $\text{MgSO}_4$  also terminates TdP effectively, but this is unsuitable for daily therapy (Johnson et al., 2001; Viskin, 1999). Interestingly,  $\text{Mg}^{2+}$  may be efficacious because it blocks both  $I_{\text{Ca}}$  and SR  $\text{Ca}^{2+}$  release, but little is known about what controls the level of this ion intracellularly (Eisner et al., 1998; Iseri and French, 1984; Wang et al., 2004).

Compared to other types of LQTS, LQT3 is the most lethal (Bankston et al., 2007; Terrenoire et al., 2013; Zareba et al., 1998). Our results suggest that the LQT3 phenotype can be complex, depending directly on mutant  $\text{Na}^+$  channels, and

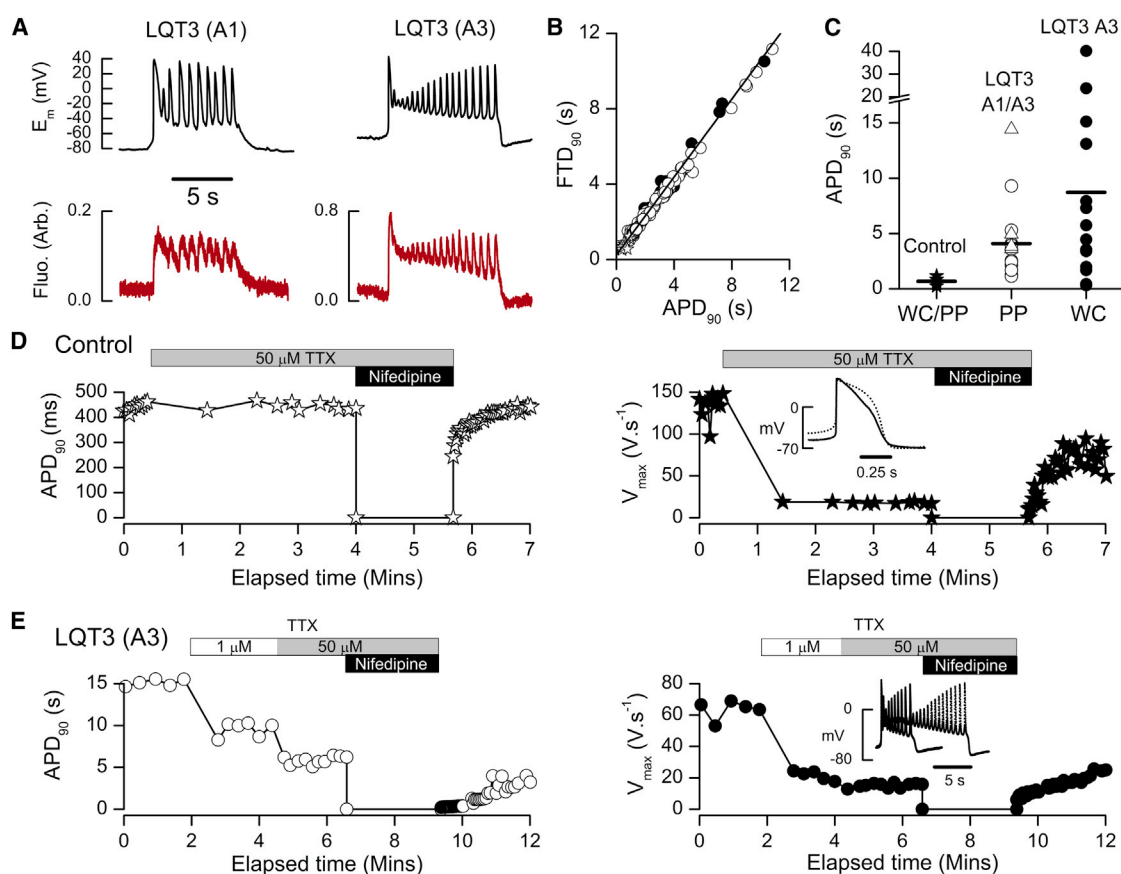

**Figure 6. Phenotype and Pharmacology of LQT3 iPS-CM**

(A) APs ( $E_m$  in mV, top) and  $[\text{Ca}^{2+}]_i$  transients (Fluo in arbitrary units, bottom) from microclusters representative of the two LQT3 clones (as labeled). Axes refer to traces to the right, and timescale bar refers to all traces.

(B) Plots of  $\text{FTD}_{90}$  versus  $\text{APD}_{90}$  from clone A1 (filled symbols) and A3 (open symbols) on the same axes, with a combined linear fit: slope =  $1.03 \pm 0.07$ , intercept =  $0.25 \pm 0.02$ ,  $R^2 = 0.99$ .

(C) Dot plot showing  $\text{APD}_{90}$  from microclusters under whole cell mode (WC, closed symbols) and perforated patch clamp (PP, open symbols) in control (stars), LQT3 clone A1 (triangles), and LQT3 clone A3 (circles). Means were nonsignificantly different between LQT3 clones, or between PP and WC in any single cell type. Lines represent the overall mean in each category (combined in Table S1).

(D) Left:  $\text{APD}_{90}$  in a representative control microcluster when exposed to  $50 \mu\text{M}$  TTX (gray bar), and later after adding  $2 \mu\text{M}$  nifedipine (black bar). Introducing TTX initially interrupted beating for 51 s (mean pause  $24 \pm 7$  s,  $n = 7$ ), but recovery followed. Right:  $V_{\text{max}}$  for upstrokes (in the same APs) diminished from  $134.5 \pm 4.8$  V/s to  $17.9 \pm 0.3$  V/s in TTX. Inset: sample APs before (broken trace) and during (solid trace) TTX exposure showing that TTX altered the AP profile, leaving  $\text{APD}_{90}$  unchanged.

(E) Left:  $\text{APD}_{90}$  changes, equivalent to (D), in an LQT3 (A3) microcluster during exposure to  $1 \mu\text{M}$  TTX (white bar),  $50 \mu\text{M}$  TTX (gray bar), and  $50 \mu\text{M}$  TTX plus  $2 \mu\text{M}$  nifedipine (black bar). Right:  $V_{\text{max}}$  plot in the same LQT3 microcluster. Inset: APs before (broken trace) and during exposure to  $50 \mu\text{M}$  TTX (solid trace).

partly on other conductances.  $I_{\text{Ca}}$  made up most of the measurable late inward current in LQT3 iPS-CM, substantiating the possibility that blocking this current (for which persistence is known) could be specifically useful in LQT3 (Linz and Meyer, 2000; Thomas et al., 2007). However, doubts have been expressed about whether studies using stem cell-derived myocytes are directly applicable to real-life medicine, because such cells are acknowledged to be relatively immature (Doss et al., 2012; Lieu et al., 2009). On the other hand, immaturity and spontaneous beating

in stem cell-derived myocytes has not prevented the successful development of assays for arrhythmogenesis, with some producing traces similar to ours (Abassi et al., 2012; Chang et al., 2012; Terrenoire et al., 2013). Because we could not fully constrain automaticity by electrical pacing, future studies would be aided by fuller elucidation of the underlying mechanisms or uncovering which transcription factors are required for complete iPS-CM differentiation.

Another issue relates to the choice of appropriate controls in a disease with incomplete penetrance, as highlighted by



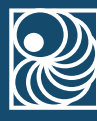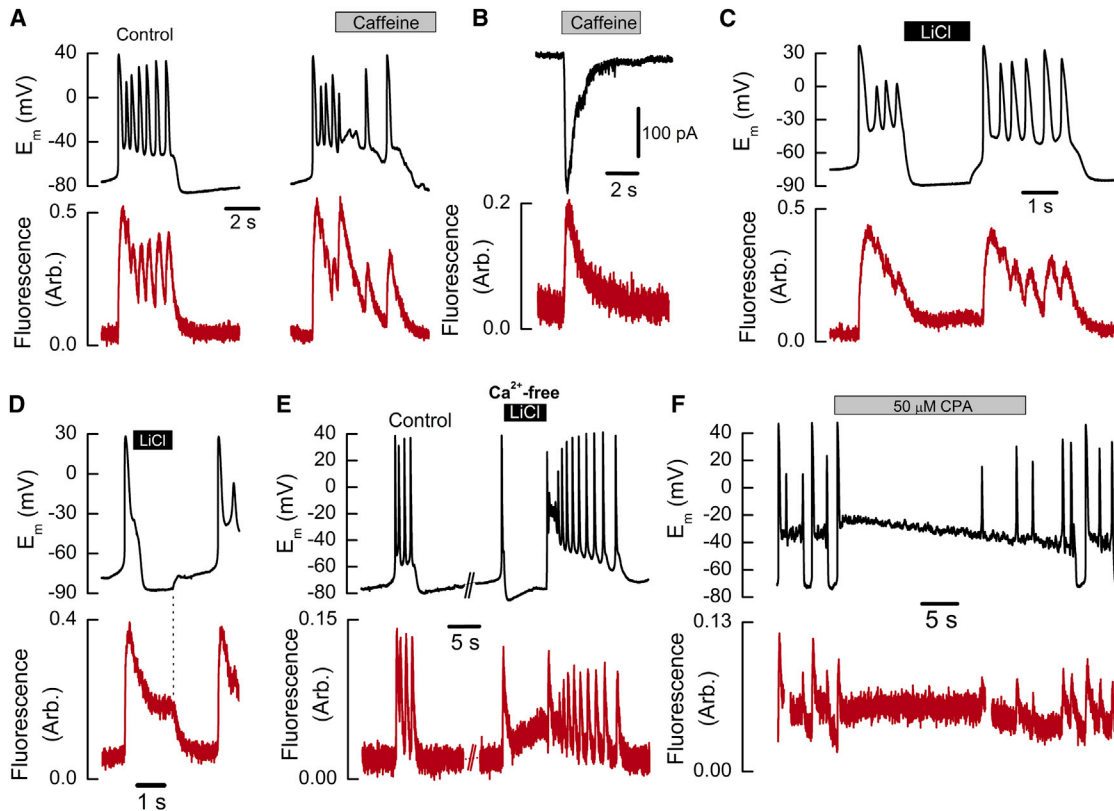

### Figure 7. The Role of Cytosolic $\text{Ca}^{2+}$ in the LQT3 Phenotype

(A) Representative LQT3 (A3) APs (top) and  $[\text{Ca}^{2+}]_i$  transients (bottom) before (left) and during (right) exposure to 10 mM caffeine (gray bar). Axes refer to traces to the right, and timescale bar refers to all traces (representative of ten LQT3 (A3) and four LQT3 (A1) microclusters).

(B) Inward current (top trace) recorded, at  $-80$  mV, from an LQT3 (A3) myocyte under perforated patch, during a caffeine puff (gray bar) that evoked SR  $\text{Ca}^{2+}$  release (lower panel).  $\text{Li}^+$  sensitivity (not shown) confirmed this current as  $I_{\text{NCX}}$  ( $n = 5$ ).

(C) A prolonged LQT3 (A3) AP was rapidly terminated after most extracellular NaCl (except 5 mM) was replaced by with LiCl (black bar).  $E_m$  was hyperpolarized, cytosolic  $\text{Ca}^{2+}$  was tonically elevated, and  $\text{Li}^+$  washout evoked another AP. Results were similar in eight replicate microclusters.

(D) In a different preparation, the AP accompanying LiCl washout was more delayed, fortuitously revealing that unblocking  $I_{\text{NCX}}$  produced  $\text{Ca}^{2+}$  efflux and a simultaneous depolarization (dotted line).

(E) LiCl, applied in  $\text{Ca}^{2+}$ -free extracellular solution (black bar) to additionally eliminate outward  $I_{\text{NCX}}$ , terminated LQT3 (A1) APs, as in (C) ( $n = 8$ ). The AP associated with  $\text{Li}^+$  washout was markedly prolonged relative to prior APs (labeled “control”).

(F) Time course of LQT3 (A3) APs (upper panel) and  $[\text{Ca}^{2+}]_i$  transients (lower, red trace) during exposure to 50  $\mu\text{M}$  cyclopiazonic acid (CPA) to block SERCA (gray bar). A slowly decaying, prolonged plateau of cytosolic  $\text{Ca}^{2+}$  established a corresponding long depolarization, proceeding beyond CPA washout. Gaps in the fluorescence trace correspond to shutter closures. (Representative of five microclusters showing similar responses.)

our finding that LQT2 iPS-CM were relatively resistant to nifedipine compared to the other genotypes. Mitigating this, when we exposed control myocytes to HERG blockers, the resulting marked AP prolongation modeled LQTS in the absence of a genetic modification. Moreover, in the present studies and in some published findings, patient-derived iPS-CM lines exhibited exaggerated LQTS phenotypes as compared to clinical experience—though electrotonic and other passive effects alter the observable disease manifestations in organized tissue. Other groups found mild LQTS

phenotypes, even in isogenic LQTS lines, and we found less dramatic AP prolongations in large colonies  $>100$  myocytes (Bellin et al., 2013; Itzhaki et al., 2011; Matsa et al., 2011). Because microcluster control APDs closely matched published values from intact ventricles (Khan et al., 2010; Terrenoire et al., 2013), we suspect that a more hyperpolarized MDP may have produced a more physiologically appropriate resting state, evidenced by a generally large  $V_{\text{max}}$  for AP upstrokes (see Table S1). Arguably, this led to heightened responses to LQTS mutations and to



torsadogenic drugs. Initially, we obtained MDP no deeper than  $-65$  mV (similar to other studies), but as our differentiation technique improved, the myocytes matured developmentally (Bellin et al., 2013; Doss et al., 2012; Itzhaki et al., 2011; Zhang et al., 2012). Moreover, isolated myocytes are likely to show more severe phenotypes due to the lack of compensatory mechanisms present in the native circulatory system. Finally, in validating the functionally syncytial nature of myocyte microclusters, we were also able to show that brief APs were associated invariably with brief  $[\text{Ca}^{2+}]_i$  transients, and vice versa.

Prolonged APs and EADs are typical of pharmacologically induced LQTS modeled in nonhuman hearts (Shimizu and Antzelevitch, 2000; Studenik et al., 2001; Terentyev et al., 2014), yet few such studies examined  $[\text{Ca}^{2+}]_i$  transients. The lengthening of APs and  $[\text{Ca}^{2+}]_i$  transients after pharmacologically blocking  $I_{K_r}$  in control iPSC-CM, in direct parallel to animal studies, well corroborates our evidence from LQTS myocytes. Insights such as this suggest that benefits may accrue from routinely deriving iPSC-CM from LQTS patients, both for risk assessment, and to guide treatments including whether to employ  $\text{Ca}^{2+}$  channel blockers (Terrenoire et al., 2013). In conclusion, our results contend that existing or novel  $\text{Ca}^{2+}$  antagonists (perhaps acting to shift the level of cytosolic  $\text{Mg}^{2+}$ ) may help us to reduce the risk of cardiac events in the LQTS population.

## EXPERIMENTAL PROCEDURES

### Patient Recruitment and Characteristics

Two LQTS patients and two control individuals, who supplied written consent forms, were biopsied for dermal fibroblasts. All protocols were approved by the Committee on Human Research at the University of California, San Francisco, and conformed to the declaration of Helsinki principles. Patient 1, a 54-year-old female with LQT2 and  $\text{QT}_c$  of 493 ms on surface electrocardiogram (Figure S1A), initially presented with unexplained syncope. Genetic testing revealed a heterozygous A422T mutation (1264G > A) in the HERG  $\text{K}^+$  channel (gene: *KCNH2*). Patient 2 was born with  $\text{QT}_c$  of 523 ms and had had a pacemaker implanted to address bradycardia and TdP (Figure S1A). A de novo N406K (1218C > A) mutation in  $\text{Na}_v1.5$  (gene: *SCN5A*) led to diagnosis of LQT3. This patient unfortunately passed away during sleep, a year after her skin biopsy (aged 19). Two unrelated individuals without pre-existing disease or arrhythmia provided tissue samples for control iPSC lines. Both subjects had normal QT intervals ( $\text{QT}_c < 450$  ms). Fibroblasts from all skin biopsies were isolated, expanded and later banked under liquid nitrogen.

### Production and Differentiation of iPSCs

Fibroblasts were reprogrammed and differentiated using minor modifications to the protocols listed in Supplemental Experimental Procedures (Takahashi et al., 2007; Zhang et al., 2012).

For each patient genotype, two clones were used for functional studies (named A3 and A4 in LQT2, A1 and A3 in LQT3).

### Electrophysiology

At least 30 days postdifferentiation, visibly beating myocytes were dispersed by trypsinization onto fibronectin- or gelatin-coated coverslips (no. 1, CS15R, Warner Instruments). Populated coverslips were incubated in RPMI complete medium (changed every 3 days), and were transferred to the superfusion bath (Warner RC-26GLP) on a Nikon TiS inverted microscope equipped with a photomultiplier (PMT) microfluorometer (IonOptix, PMT400) and motion detector (VED, Crescent Electronics). Extracellular solutions, delivered locally near the patch-clamp electrode, were warmed to  $30^\circ\text{C}$  with a superfusion system (AutoMate Scientific). One myocyte of a synchronously beating microcluster was patch-clamped, while fluorescence was recorded simultaneously from the entire microcluster. Whole-cell and perforated patch clamp were employed in different experiments. An Axopatch 200B amplifier (Molecular Devices) was coupled via pClamp software (v10) to patch electrodes of 2–3  $\text{M}\Omega$  (1B-150F; WPI) filled with intracellular solution containing (mM): 120 KCl, 20 NaHEPES, 10 MgATP, 0.1  $\text{K}_2\text{EGTA}$ , 2  $\text{MgCl}_2$ , set to pH 7.1 with KOH. Perforated patch was used to record from Fluo-4 loaded myocytes after adding 240  $\mu\text{g}/\text{ml}$  of amphotericin B plus 5 mM EGTA to the same pipette solution (Rae et al., 1991). If  $[\text{Ca}^{2+}]_i$  transients were absent or diminished (due to patch rupture, allowing EGTA to chelate cytosolic  $\text{Ca}^{2+}$ ) the experiment was terminated. Myocytes were superfused at constant flow (W2-64, Warner Instruments) with modified Tyrode's solution containing (mM): 137 NaCl, 10 NaHEPES, 10 dextrose, 5 KCl, 2  $\text{CaCl}_2$ , 1  $\text{MgCl}_2$ . This solution was set to pH 7.4 with NaOH. NCX was inhibited by replacing external NaCl with 137 mM LiCl, and in some experiments,  $\text{CaCl}_2$  was omitted with no ionic substitution. In pharmacological experiments, drugs (caffeine, cisapride, E-4031) were obtained from Sigma or Ascent Scientific and the level of DMSO vehicle was  $<1\%$ . The Axopatch amplifier was set to current clamp at zero applied current, and spontaneous APs were recorded for 30 s per data file.

Sodium current ( $I_{\text{Na}}$ ) was recorded from single myocytes with high EGTA intracellular solution (as above) in which  $\text{K}^+$  was replaced by  $\text{Cs}^+$ . Rapid delayed rectifier  $\text{K}^+$  current ( $I_{\text{Kr}}$ ) was measured after dialyzing with intracellular solution containing (mM) 130 KCl, 1  $\text{MgCl}_2$ , 5 EGTA, 5 MgATP, 10 HEPES (pH 7.2 with KOH). The HERG-related tail current was quantified by difference (Figure 1D) using extracellular solution (with and without 5  $\mu\text{M}$  E-4031) containing (mM): 137 NaCl, 4 KCl, 1.8  $\text{CaCl}_2$ , 1  $\text{MgCl}_2$ , 10 glucose, and 10 HEPES (pH 7.4 with NaOH).

### Intracellular $\text{Ca}^{2+}$ Measurements

Myocytes on coverslips were loaded with the  $\text{Ca}^{2+}$  indicator dye Fluo-4 AM, before transfer to the superfusion chamber. Loading solution contained a 1:10 mixture of 5 mM Fluo-4 AM in dry DMSO and Powerload concentrate (P10020, Invitrogen), diluted 100-fold into extracellular solution and substituted for the culture medium (5  $\mu\text{M}$  final [Fluo-4]). Loading proceeded for 20 min at room temperature, followed by 20 min in dye-free extracellular solution for de-esterification before commencing recordings.  $\text{Ca}^{2+}$  transients were



recorded via a standard filter set (#49011 ET, Chroma Technology). Between sampling periods, excitation light was blocked by a shutter (CS35, Vincent Associates). Background fluorescence was recorded after removing the cell(s) from the field of view. Fluo-4 AM was purchased from Molecular Probes (Invitrogen). In some experiments, the PMT system was replaced by a high-resolution, fast charge-coupled device camera (MiCam02, SciMedia) to visualize  $[\text{Ca}^{2+}]_i$  transients by videomicroscopy. Frame rates of 30–100 fps were used. Movies were analyzed with Image J software (<http://rsbweb.nih.gov/ij/>).

#### Electrophysiological Data Analysis

APs were digitized at 5 kHz and low-pass filtered at 2 kHz. Every consecutive AP (and  $[\text{Ca}^{2+}]_i$  transient) was measured in each data sweep. The median number of files defining an APD phenotype was three, corresponding to 90 s of continuous recording (45 APs at 0.5 Hz). The maximum depolarization rate in the AP upstroke ( $V_{\text{max}}$ ) was calculated using OriginPro 8.6 software (OriginLab) or Clampfit (pClamp 10, Molecular Devices). AP amplitude and duration, determined between the upstroke (at  $V_{\text{max}}$ ) and 90% repolarization ( $\text{APD}_{90}$ ), were determined using in-house analysis routines in Excel 2007 (Microsoft), with correction for a  $-5.6$  mV liquid junction potential. Microclusters with a maximum diastolic potential (MDP) positive to  $-65$  mV were eliminated from analysis. The time course of  $[\text{Ca}^{2+}]_i$ -dependent fluorescence transients was quantified as the duration at 10% amplitude (10%–90% time); or for correlation with  $\text{APD}_{90}$ , as  $\text{FTD}_{90}$ , based on the duration at 10% amplitude measured from  $V_{\text{max}}$  of the AP (coincident with the upswing of the fluorescence transient). To avoid movement artifacts in fluorescence recordings, cells and microclusters were framed by a cell-free border and bright-field images were recorded. In some experiments, cell motion was quantified from videomicrographs using an edge-detector algorithm written in LabView (National Instruments), calibrated using a stage micrometer. All statistical comparisons were performed using two-tailed, paired, or unpaired t tests. Mean values are presented with standard errors (mean  $\pm$  SEM), and the numbers of replicates indicate numbers of independent microclusters constituting the mean.

#### SUPPLEMENTAL INFORMATION

Supplemental Information includes Supplemental Experimental Procedures, seven figures, one table, and one movie and can be found with this article online at <http://dx.doi.org/10.1016/j.stemcr.2014.06.003>.

#### AUTHOR CONTRIBUTIONS

C.I.S. designed and performed patch clamp, fluorescence, and pharmacological studies in iPS-CM and wrote the manuscript; S. Baba designed and performed fibroblast reprogramming, molecular confirmation of DNA, and protein expression in iPSCs and iPS-CM and assisted with the manuscript; K.N. recruited patients, assisted with reprogramming, advised on molecular confirmation of DNA and protein expression, and assisted with the manuscript; E.A.H. prepared and maintained iPSCs and iPS-CM cultures; M.A.E.S. referred patients, collected patient information, and prepared and maintained iPSCs and iPS-CM cultures; C.F. programmed analysis software in the LabView environment; J.Z.

advised on methods for preparing iPS-CM cultures and assisted with the manuscript; S. Balijepalli performed  $I_{\text{Kr}}$  voltage clamp electrophysiology and assisted with the manuscript; K.T. advised on reprogramming and molecular confirmation of DNA and protein expression and advised on manuscript; Y.H. advised on reprogramming and molecular confirmation of DNA and protein expression and advised on manuscript; P.L. prepared and maintained iPSCs and iPS-CM cultures; J.W. and M.M.S. referred patients, collected patient information, and assisted with the manuscript; K.A.-S. helped conceive project design, assisted with recruiting of patients, and assisted with the manuscript; C.T.J. managed iPS-CM production and voltage-clamp experiments in Wisconsin and assisted with the manuscript; J.C.M. and K.E.H. assisted with the manuscript; T.J.K. advised on iPS-CM production, electrophysiology, and all aspects of the manuscript; S.Y. advised on iPS-CM production and assisted with the manuscript; B.R.C. was overall project leader and designer, recruited patients, supervised iPS-CM production, collaborations, and assisted with the manuscript.

#### ACKNOWLEDGMENTS

We thank Deepak Srivastava, Benoit G. Bruneau, Anna Lisa Lucido, Celeste Brennecke, and Gary Howard. We also thank Tim Rand, Caitlin Russell, Annie Truong, Jennie Yoo, Po-Lin So, Alice M. Sheehan, and Matt J. Spindler for technical assistance and discussions. This work was supported by NIH (R01HL60664, U01HL100406, U01HL098179, U01GM09614, and P01HL089707) and California Institute of Regenerative Medicine (CIRM) RL1-00639 grants to B.R.C.; R01HL108677 to B.R.C. and K.E.H.; a CIRM/Gladstone Institutes Fellowship (#T2-00003) to S.B., K.A.-S., and K.T.; Sarnoff Cardiovascular Research Foundation fellowship to KN; the Uehara Memorial Foundation to Y.H.; UH2TR000487 to K.E.H.; U01HL099773 and the Wisconsin Partnership CHSP grant to T.J.K.; R01HL077396 to C.T.J.; and the L.K. Whittier Foundation and the Rodenberry Foundation to S.Y. Gladstone Institutes received support from a National Center for Research Resources Grant RR18928. S.Y. is a member, without salary, of the scientific advisory board at iPS Academia Japan.

Received: July 18, 2013

Revised: June 2, 2014

Accepted: June 3, 2014

Published: July 3, 2014

#### REFERENCES

- Abassi, Y.A., Xi, B., Li, N., Ouyang, W., Seiler, A., Watzele, M., Kettenhofen, R., Bohlen, H., Ehlich, A., Kolossov, E., et al. (2012). Dynamic monitoring of beating periodicity of stem cell-derived cardiomyocytes as a predictive tool for preclinical safety assessment. *Br. J. Pharmacol.* *165*, 1424–1441.
- Bailie, D.S., Inoue, H., Kaseda, S., Ben-David, J., and Zipes, D.P. (1988). Magnesium suppression of early afterdepolarizations and ventricular tachyarrhythmias induced by cesium in dogs. *Circulation* *77*, 1395–1402.
- Bankston, J.R., Yue, M., Chung, W., Spyres, M., Pass, R.H., Silver, E., Sampson, K.J., and Kass, R.S. (2007). A novel and lethal de novo



- LQT-3 mutation in a newborn with distinct molecular pharmacology and therapeutic response. *PLoS ONE* 2, e1258.
- Bellin, M., Casini, S., Davis, R.P., D'Aniello, C., Haas, J., Ward-van Oostwaard, D., Tertoolen, L.G., Jung, C.B., Elliott, D.A., Welling, A., et al. (2013). Isogenic human pluripotent stem cell pairs reveal the role of a KCNH2 mutation in long-QT syndrome. *EMBO J.* 32, 3161–3175.
- Bokil, N.J., Baisden, J.M., Radford, D.J., and Summers, K.M. (2010). Molecular genetics of long QT syndrome. *Mol. Genet. Metab.* 101, 1–8.
- Chang, M.G., Chang, C.Y., de Lange, E., Xu, L., O'Rourke, B., Kargueuzian, H.S., Tung, L., Marbán, E., Garfinkel, A., Weiss, J.N., et al. (2012). Dynamics of early afterdepolarization-mediated triggered activity in cardiac monolayers. *Biophys. J.* 102, 2706–2714.
- Davis, R.P., Casini, S., van den Berg, C.W., Hoekstra, M., Remme, C.A., Dambrot, C., Salvatori, D., Oostwaard, D.W., Wilde, A.A., Bezina, C.R., et al. (2012). Cardiomyocytes derived from pluripotent stem cells recapitulate electrophysiological characteristics of an overlap syndrome of cardiac sodium channel disease. *Circulation* 125, 3079–3091.
- Doering, A.E., Nicoll, D.A., Lu, Y., Lu, L., Weiss, J.N., and Philipson, K.D. (1998). Topology of a functionally important region of the cardiac Na<sup>+</sup>/Ca<sup>2+</sup> exchanger. *J. Biol. Chem.* 273, 778–783.
- Doss, M.X., Di Diego, J.M., Goodrow, R.J., Wu, Y., Cordeiro, J.M., Nesterenko, V.V., Barajas-Martínez, H., Hu, D., Urrutia, J., Desai, M., et al. (2012). Maximum diastolic potential of human induced pluripotent stem cell-derived cardiomyocytes depends critically on I(Kr). *PLoS ONE* 7, e40288.
- Eisner, D.A., Trafford, A.W., Díaz, M.E., Overend, C.L., and O'Neill, S.C. (1998). The control of Ca release from the cardiac sarcoplasmic reticulum: regulation versus autoregulation. *Cardiovasc. Res.* 38, 589–604.
- Guo, D., Zhao, X., Wu, Y., Liu, T., Kowey, P.R., and Yan, G.X. (2007). L-type calcium current reactivation contributes to arrhythmogenesis associated with action potential triangulation. *J. Cardiovasc. Electrophysiol.* 18, 196–203.
- Inoue, H., and Yamanaka, S. (2011). The use of induced pluripotent stem cells in drug development. *Clin. Pharmacol. Ther.* 89, 655–661.
- Iseri, L.T., and French, J.H. (1984). Magnesium: nature's physiologic calcium blocker. *Am. Heart J.* 108, 188–193.
- Itzhaki, I., Maizels, L., Huber, I., Zwi-Dantsis, L., Caspi, O., Winterstern, A., Feldman, O., Gepstein, A., Arbel, G., Hammerman, H., et al. (2011). Modelling the long QT syndrome with induced pluripotent stem cells. *Nature* 471, 225–229.
- Jackman, W.M., Szabo, B., Friday, K.J., Fitzgerald, D.M., Moulton, K., Wang, X., Patterson, E., and Lazzara, R. (1990). Ventricular tachyarrhythmias related to early afterdepolarizations and triggered firing: relationship to QT interval prolongation and potential therapeutic role for calcium channel blocking agents. *J. Cardiovasc. Electrophysiol.* 1, 170–195.
- January, C.T., and Riddle, J.M. (1989). Early afterdepolarizations: mechanism of induction and block. A role for L-type Ca<sup>2+</sup> current. *Circ. Res.* 64, 977–990.
- January, C.T., Chau, V., and Makielski, J.C. (1991). Triggered activity in the heart: cellular mechanisms of early after-depolarizations. *Eur Heart J* 12 (Suppl F), 4–9.
- Johnson, J.P., Jr., Balsler, J.R., and Bennett, P.B. (2001). A novel extracellular calcium sensing mechanism in voltage-gated potassium ion channels. *J. Neurosci.* 21, 4143–4153.
- Kamiya, K., Niwa, R., Morishima, M., Honjo, H., and Sanguinetti, M.C. (2008). Molecular determinants of hERG channel block by terfenadine and cisapride. *J. Pharmacol. Sci.* 108, 301–307.
- Khan, J.N., Prasad, N., and Glancy, J.M. (2010). QTc prolongation during therapeutic hypothermia: are we giving it the attention it deserves? *Europace* 12, 266–270.
- Komiya, N., Tanaka, K., Doi, Y., Fukae, S., Nakao, K., Isomoto, S., Seto, S., and Yano, K. (2004). A patient with LQTS in whom verapamil administration and permanent pacemaker implantation were useful for preventing torsade de pointes. *Pacing Clin. Electrophysiol.* 27, 123–124.
- Lahti, A.L., Kujala, V.J., Chapman, H., Koivisto, A.P., Pekkanen-Mattila, M., Kerkelä, E., Hyttinen, J., Kontula, K., Swan, H., Conklin, B.R., et al. (2012). Model for long QT syndrome type 2 using human iPSC cells demonstrates arrhythmogenic characteristics in cell culture. *Dis. Model. Mech.* 5, 220–230.
- Lieu, D.K., Liu, J., Siu, C.W., McNerney, G.P., Tse, H.F., Abu-Khalil, A., Huser, T., and Li, R.A. (2009). Absence of transverse tubules contributes to non-uniform Ca(2+) wavefronts in mouse and human embryonic stem cell-derived cardiomyocytes. *Stem Cells Dev.* 18, 1493–1500.
- Linz, K.W., and Meyer, R. (2000). Profile and kinetics of L-type calcium current during the cardiac ventricular action potential compared in guinea-pigs, rats and rabbits. *Pflugers Arch.* 439, 588–599.
- Madhvani, R.V., Xie, Y., Pantazis, A., Garfinkel, A., Qu, Z., Weiss, J.N., and Olcese, R. (2011). Shaping a new Ca<sup>2+</sup> conductance to suppress early afterdepolarizations in cardiac myocytes. *J. Physiol.* 589, 6081–6092.
- Makielski, J.C., and January, C.T. (1998). Proarrhythmia related to prolongation of repolarization: mechanisms, monitoring, prevention and management. *Card. Electrophysiol. Rev.* 2, 132–135.
- Marbán, E. (2002). Cardiac channelopathies. *Nature* 415, 213–218.
- Matsa, E., Rajamohan, D., Dick, E., Young, L., Mellor, I., Staniforth, A., and Denning, C. (2011). Drug evaluation in cardiomyocytes derived from human induced pluripotent stem cells carrying a long QT syndrome type 2 mutation. *Eur. Heart J.* 32, 952–962.
- Moss, A.J., and Kass, R.S. (2005). Long QT syndrome: from channels to cardiac arrhythmias. *J. Clin. Invest.* 115, 2018–2024.
- Moss, A.J., and Schwartz, P.J. (2005). 25th anniversary of the International Long-QT Syndrome Registry: an ongoing quest to uncover the secrets of long-QT syndrome. *Circulation* 111, 1199–1201.
- Rae, J., Cooper, K., Gates, P., and Watsky, M. (1991). Low access resistance perforated patch recordings using amphotericin B. *J. Neurosci. Methods* 37, 15–26.
- Roden, D.M., and Viswanathan, P.C. (2005). Genetics of acquired long QT syndrome. *J. Clin. Invest.* 115, 2025–2032.





- Sakmann, B.F., Spindler, A.J., Bryant, S.M., Linz, K.W., and Noble, D. (2000). Distribution of a persistent sodium current across the ventricular wall in guinea pigs. *Circ. Res.* 87, 910–914.
- Schwartz, P.J., Priori, S.G., Spazzolini, C., Moss, A.J., Vincent, G.M., Napolitano, C., Denjoy, I., Guicheney, P., Breithardt, G., Keating, M.T., et al. (2001). Genotype-phenotype correlation in the long-QT syndrome: gene-specific triggers for life-threatening arrhythmias. *Circulation* 103, 89–95.
- Shimizu, W., and Antzelevitch, C. (2000). Differential effects of beta-adrenergic agonists and antagonists in LQT1, LQT2 and LQT3 models of the long QT syndrome. *J. Am. Coll. Cardiol.* 35, 778–786.
- Sobie, E.A., Song, L.S., and Lederer, W.J. (2006). Restitution of Ca(2+) release and vulnerability to arrhythmias. *J. Cardiovasc. Electrophysiol.* 17 (Suppl 1), S64–S70.
- Spencer, C.I., and Sham, J.S. (2003). Effects of Na<sup>+</sup>/Ca<sup>2+</sup> exchange induced by SR Ca<sup>2+</sup> release on action potentials and afterdepolarizations in guinea pig ventricular myocytes. *Am. J. Physiol. Heart Circ. Physiol.* 285, H2552–H2562.
- Studenik, C.R., Zhou, Z., and January, C.T. (2001). Differences in action potential and early afterdepolarization properties in LQT2 and LQT3 models of long QT syndrome. *Br. J. Pharmacol.* 132, 85–92.
- Takahashi, K., Tanabe, K., Ohnuki, M., Narita, M., Ichisaka, T., Tomoda, K., and Yamanaka, S. (2007). Induction of pluripotent stem cells from adult human fibroblasts by defined factors. *Cell* 131, 861–872.
- Terentyev, D., Li, W., Terentyeva, R., Cooper, L., Lu, Y., Jindal, H., Peng, X., and Koren, G. (2014). Hyperphosphorylation of RyRs underlies triggered activity in transgenic rabbit model of LQT2 syndrome. *Biophys. J.* 106, 561a.
- Terrenoire, C., Wang, K., Tung, K.W., Chung, W.K., Pass, R.H., Lu, J.T., Jean, J.C., Omari, A., Sampson, K.J., Kotton, D.N., et al. (2013). Induced pluripotent stem cells used to reveal drug actions in a long QT syndrome family with complex genetics. *J. Gen. Physiol.* 141, 61–72.
- Thomas, G., Gurung, I.S., Killeen, M.J., Hakim, P., Goddard, C.A., Mahaut-Smith, M.P., Colledge, W.H., Grace, A.A., and Huang, C.L. (2007). Effects of L-type Ca<sup>2+</sup> channel antagonism on ventricular arrhythmogenesis in murine hearts containing a modification in the Scn5a gene modelling human long QT syndrome 3. *J. Physiol.* 578, 85–97.
- Vincent, G.M. (2003). The long-QT syndrome—bedside to bench to bedside. *N. Engl. J. Med.* 348, 1837–1838.
- Viskin, S. (1999). Long QT syndromes and torsade de pointes. *Lancet* 354, 1625–1633.
- Wang, M., Tashiro, M., and Berlin, J.R. (2004). Regulation of L-type calcium current by intracellular magnesium in rat cardiac myocytes. *J. Physiol.* 555, 383–396.
- Wu, L., Rajamani, S., Li, H., January, C.T., Shryock, J.C., and Belardinelli, L. (2009). Reduction of repolarization reserve unmasks the proarrhythmic role of endogenous late Na<sup>+</sup> current in the heart. *Am. J. Physiol. Heart Circ. Physiol.* 297, H1048–H1057.
- Xi, J., Khalil, M., Shishechian, N., Hannes, T., Pfannkuche, K., Liang, H., Fatima, A., Haustein, M., Suhr, F., Bloch, W., et al. (2010). Comparison of contractile behavior of native murine ventricular tissue and cardiomyocytes derived from embryonic or induced pluripotent stem cells. *FASEB J.* 24, 2739–2751.
- Yamada, M., Ohta, K., Niwa, A., Tsujino, N., Nakada, T., and Hirose, M. (2008). Contribution of L-type Ca<sup>2+</sup> channels to early afterdepolarizations induced by I Kr and I Ks channel suppression in guinea pig ventricular myocytes. *J. Membr. Biol.* 222, 151–166.
- Zahanich, I., Sirenko, S.G., Maltseva, L.A., Tarasova, Y.S., Spurgeon, H.A., Boheler, K.R., Stern, M.D., Lakatta, E.G., and Maltsev, V.A. (2011). Rhythmic beating of stem cell-derived cardiac cells requires dynamic coupling of electrophysiology and Ca cycling. *J. Mol. Cell. Cardiol.* 50, 66–76.
- Zareba, W., Moss, A.J., Schwartz, P.J., Vincent, G.M., Robinson, J.L., Priori, S.G., Benhorin, J., Locati, E.H., Towbin, J.A., Keating, M.T., et al.; International Long-QT Syndrome Registry Research Group (1998). Influence of genotype on the clinical course of the long-QT syndrome. *N. Engl. J. Med.* 339, 960–965.
- Zhang, J., Klos, M., Wilson, G.F., Herman, A.M., Lian, X., Raval, K.K., Barron, M.R., Hou, L., Soerens, A.G., Yu, J., et al. (2012). Extracellular matrix promotes highly efficient cardiac differentiation of human pluripotent stem cells: the matrix sandwich method. *Circ. Res.* 111, 1125–1136.

**Stem Cell Reports, Volume 3**

**Supplemental Information**

**Calcium Transients Closely Reflect Prolonged Action  
Potentials in iPSC Models of Inherited Cardiac  
Arrhythmia**

**C. Ian Spencer, Shiro Baba, Kenta Nakamura, Ethan A. Hua, Marie A.F. Sears, Chicheng Fu, Jianhua Zhang, Sadguna Balijepalli, Kiichiro Tomoda, Yohei Hayashi, Paweena Lizarraga, Julianne Wojciak, Melvin M. Scheinman, Katriina Aalto-Setälä, Jonathan C. Makielski, Craig T. January, Kevin E. Healy, Timothy J. Kamp, Shinya Yamanaka, and Bruce R. Conklin**

Supplemental Fig. 1

1A

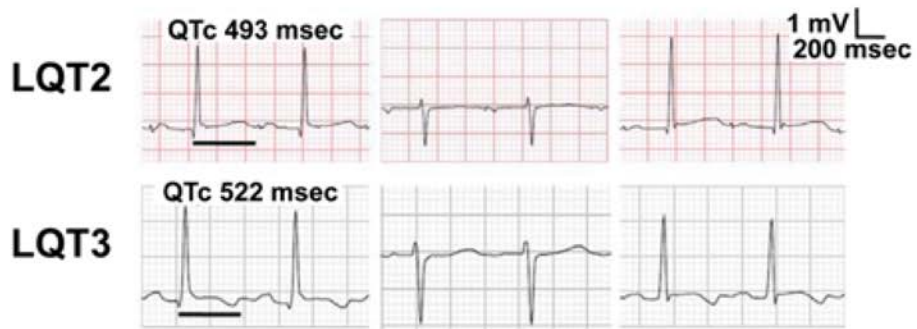

1B

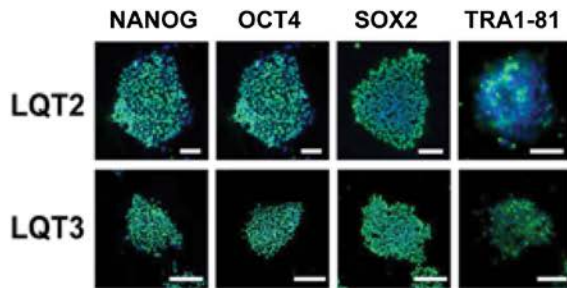

1C

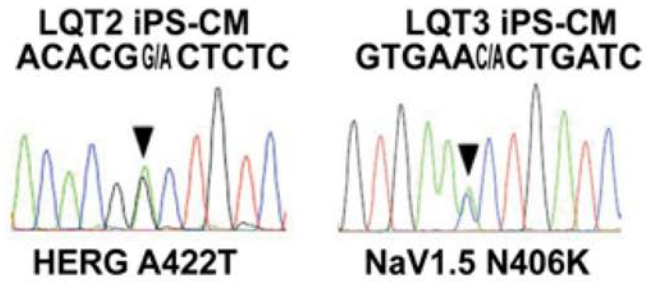

1D

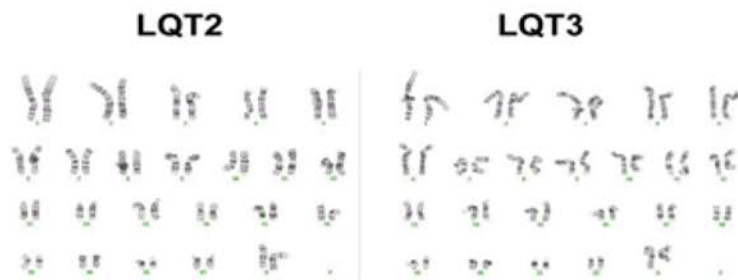

**Figure S1. Generating iPS cell lines from LQT2 and LQT3 patients: related to production and differentiation of iPS cells in Experimental Procedures.**

(A) Surface ECGs. LQT2 (upper) and LQT3 (lower) patients had a QT<sub>c</sub> of 493 ms and 522 ms, respectively (normal upper limit = 480 ms).

(B) Immunocytochemistry of representative iPS colonies of undifferentiated LQT2 and LQT3 iPS cells transduced by retroviruses packaging OCT3/4, SOX2, KLF4, and c-MYC transcription factors. Transgene silencing was demonstrated by RT-PCR (not shown) and endogenous pluripotency markers NANOG, OCT4, SOX2, and TRA1-81 were well expressed in all cells in each colony as shown by GFP (green) staining. Nuclei were counterstained with Hoechst 33342 (blue). Scale bars: 50 μm.

(C) Heterozygous mutations, A422T (1264G>A) in the *KCNH2* gene and N406K (1218C>A) in *SCN5A*, detected in the genomic DNAs of LQT2 and LQT3 iPS cell lines. Lines: black, guanosine; green, adenosine; blue, cytidine; red, thymidine.

(D) Karyotypes of LQT2 and LQT3 iPS cells (analyzed commercially by Cell Line Genetics, Madison, Wisconsin, USA) were normal.



Supplemental Fig. 2

2A

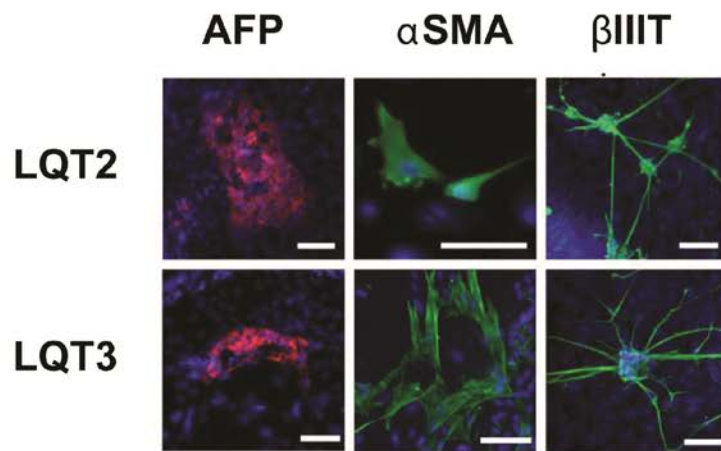

2B

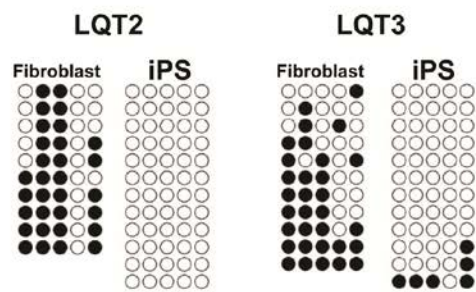

2C

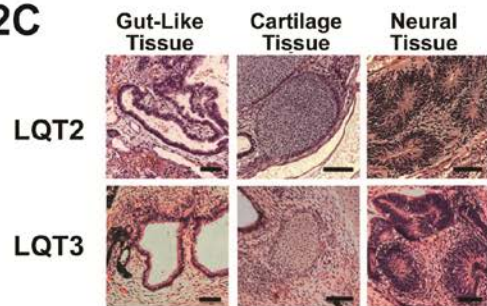

2D

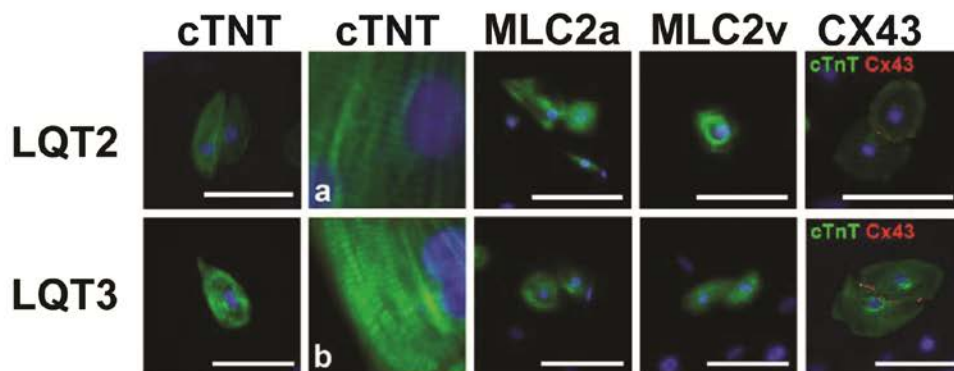

**Figure S2. LQT2 and LQT3 iPS cells demonstrated pluripotency and directed differentiation to cardiomyocytes: related to production and differentiation of iPS cells in Experimental Procedures.**

(A) Identification of all three embryonic germ layers after patient-derived iPS cells were differentiated in vitro by an embryoid body differentiation method. The germ layers were identified by immunocytochemistry: endoderm (AFP, alpha-fetoprotein-positive hepatocytes), mesoderm ( $\alpha$ -SMA, smooth muscle actin-positive smooth muscle cells), and ectoderm ( $\beta$ -III-T, beta tubulin-positive neurons). Nuclei were counterstained with Hoechst 33342 (blue). Scale bars, 10  $\mu$ m.

(B) Bisulfite sequencing results showing that the OCT4 promoter is highly methylated (turned off) in original fibroblast lines, but unmethylated in iPS cell lines. Each circle represents a CpG sequence in the promoter region. Filled circles denote methylated CpG, and open circles show unmethylated CpG. These patterns are consistent with full reprogramming of iPS cells. (C) Teratomas also revealed that LQT2 and LQT3 iPS differentiated into all three germ layers in vivo: endoderm (gut-like tissues), mesoderm (cartilage tissue) and endoderm (neural tissues). Scale bars, 20  $\mu$ m.

(D) Immunocytochemistry showed that after directed differentiation using the Matrix Sandwich Method (Zhang et al., 2012), LQT2 and LQT3 iPS cells differentiated into cTNT-, MLC2a-, and MLC2v-positive cardiomyocytes. CX43-positive gap junctions formed between cardiomyocytes. Nuclei were counterstained with Hoechst 33342 (blue). Scale bars, 10  $\mu$ m.

### Supplemental Fig. 3

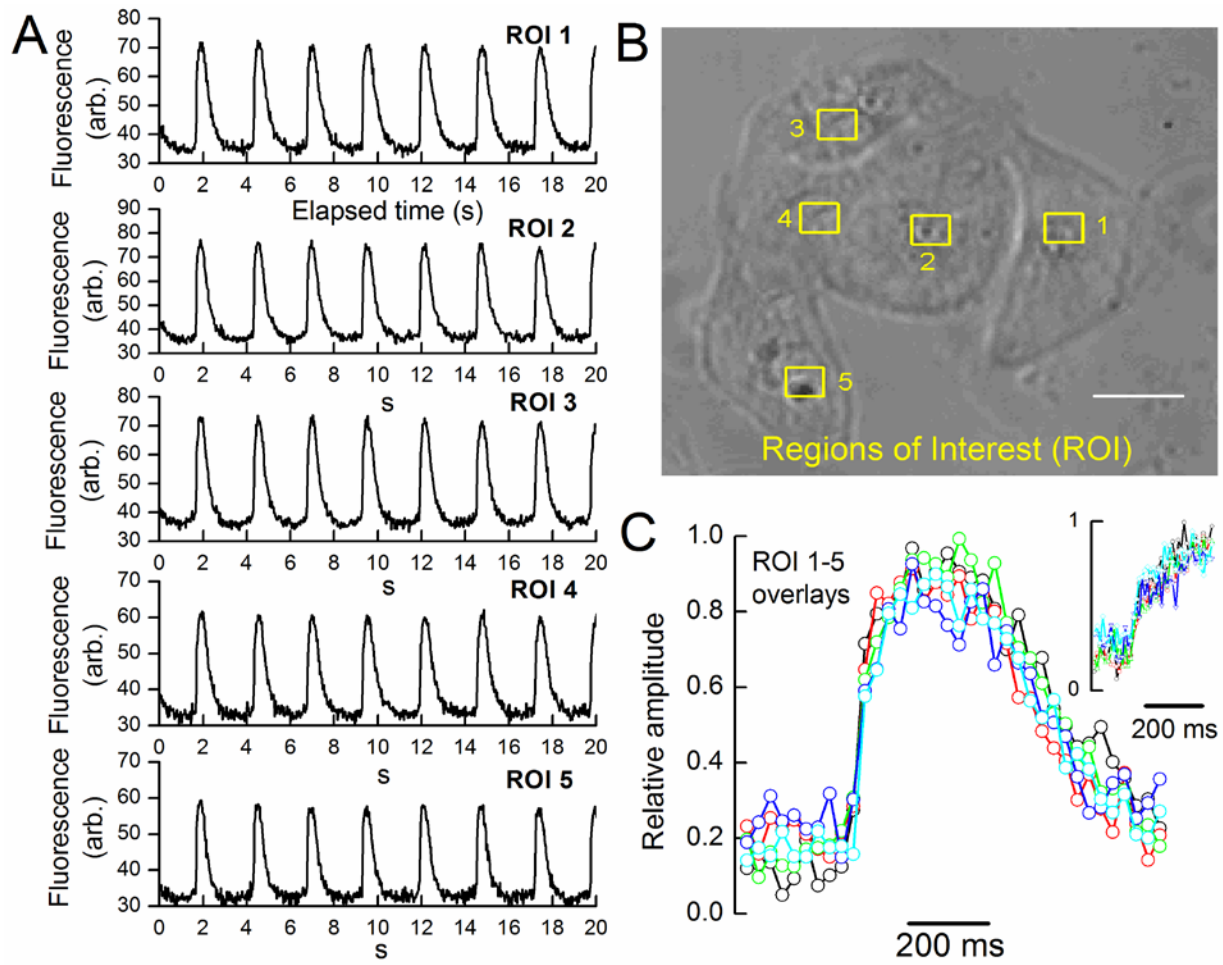

**Figure S3. Comparing spontaneous  $[Ca^{2+}]_i$  transients in individual myocytes of a control microcluster: related to *Functional Characterization of Control and LQT2 iPS-CM* in Results.**

(A) Fluo-4 fluorescence was averaged in small regions of interest (ROI), such that each ROI was within a single myocyte of a five-cell microcluster and plotted (top to bottom) versus time (from videomicroscopy). The ROI number in the upper right corner relates to areas defined in ImageJ software.

(B) The numbered ROIs, within which fluorescence was averaged (yellow rectangles), are superimposed on a transmitted light image of the microcluster. Scale bar: 50  $\mu\text{m}$ .

(C) Overlaid time-course plots for the same single spontaneous  $[Ca^{2+}]_i$  transient measured in each ROI of the microcluster are shown at 30-ms resolution (33 frames/s in the videomicrograph). The rising phase of the transients superimpose completely within a single video frame. Inset: the equivalent  $[Ca^{2+}]_i$  transient time courses were recorded at a resolution of 10 ms (100 frames/s). Despite a lower signal-to-noise ratio, the  $[Ca^{2+}]_i$  transient upstrokes completely synchronized within a single video frame. Similar results were obtained from twenty microclusters recorded at 30-ms resolution and five microclusters at 10-ms resolution.



# Supplemental Fig. 4

## A

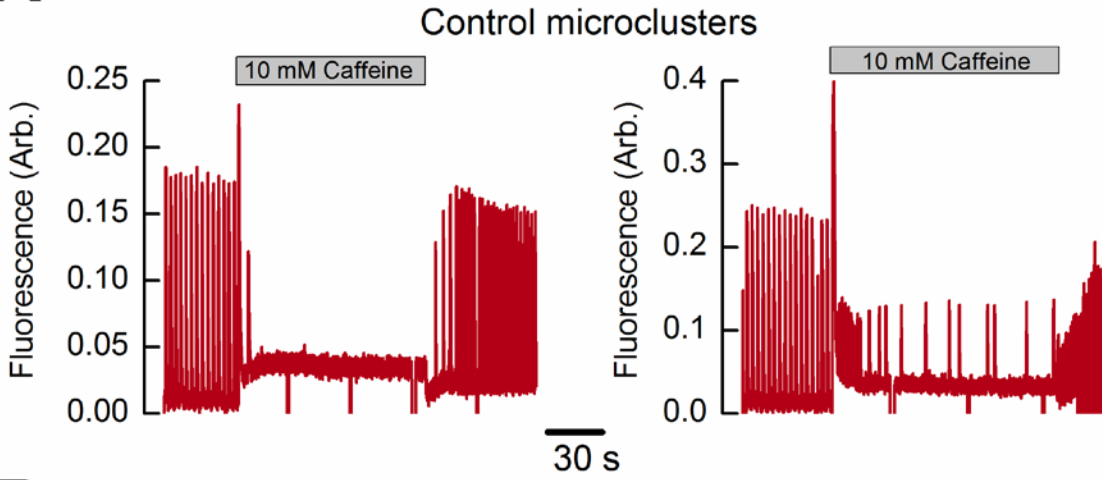

## B

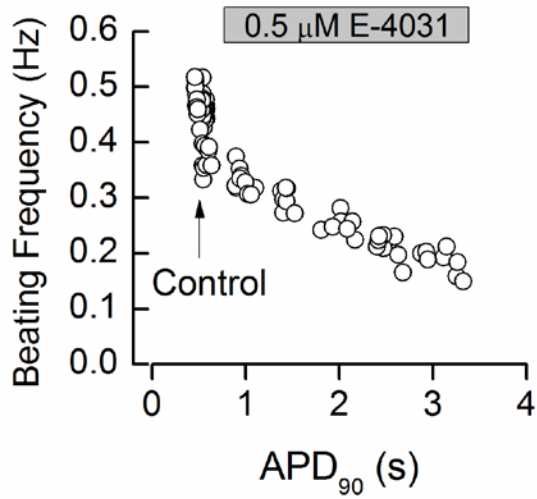

## C

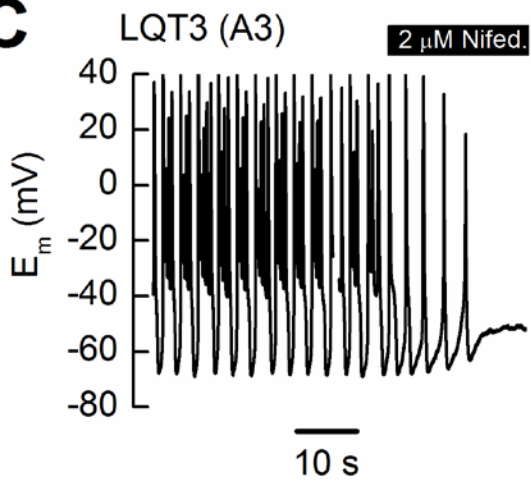

## D

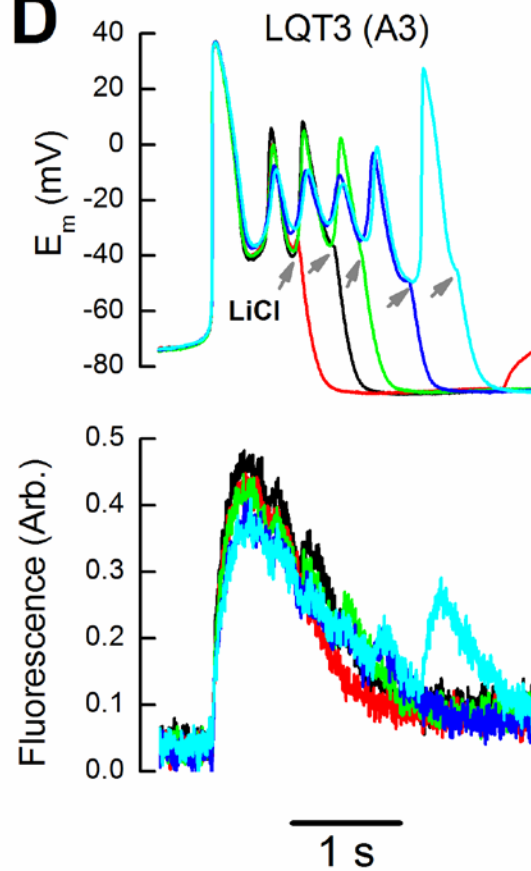

**Figure S4. Additional pharmacology data: related to Results.**

(A) Effects of superfusing 10 mM caffeine (gray bar) on spontaneous  $[Ca^{2+}]_i$  transients (arbitrary units, red) recorded continuously in control microclusters. Caffeine initially evoked a large single  $[Ca^{2+}]_i$  transient due to total release of the SR  $Ca^{2+}$  load, after which beating ceased in the majority (64%) of myocyte microclusters (left). Some microclusters continued to beat with  $[Ca^{2+}]_i$  transients of reduced amplitude and frequency (right). Step-like downward deflections represent shutter closures. Timescale bar refers to both panels.

(B) Plot of beating frequency, calculated from each preceding diastolic interval, versus  $APD_{90}$  during E-4031 treatment of a control microcluster (shown in Figure 5). As  $I_{Kr}$  block increased, APs lengthened and the beating frequency fell in direct proportion.

(C) Effects of exposing a typical LQT3 (A3) microcluster to nifedipine (black bar). Blocking  $I_{Ca}$  caused dramatic AP abbreviation before beating ceased. During arrest,  $E_m$  was  $\approx -60$  mV.

(D) Superimposed (color-coded) APs ( $E_m$ , Upper) and  $[Ca^{2+}]_i$  transients (Lower, fluorescence in arbitrary units) from a representative LQT3 (A3) microcluster exposed to extracellular LiCl to block NCX after a sequentially increasing number of EADs (gray arrows). Each color represents the same AP and  $[Ca^{2+}]_i$  transient, terminated by extracellular  $Li^+$  at the time indicated by the arrow. Between  $Li^+$  applications (traces), the microcluster was briefly permitted to return to steady-state beating.

Supplemental Fig. 5

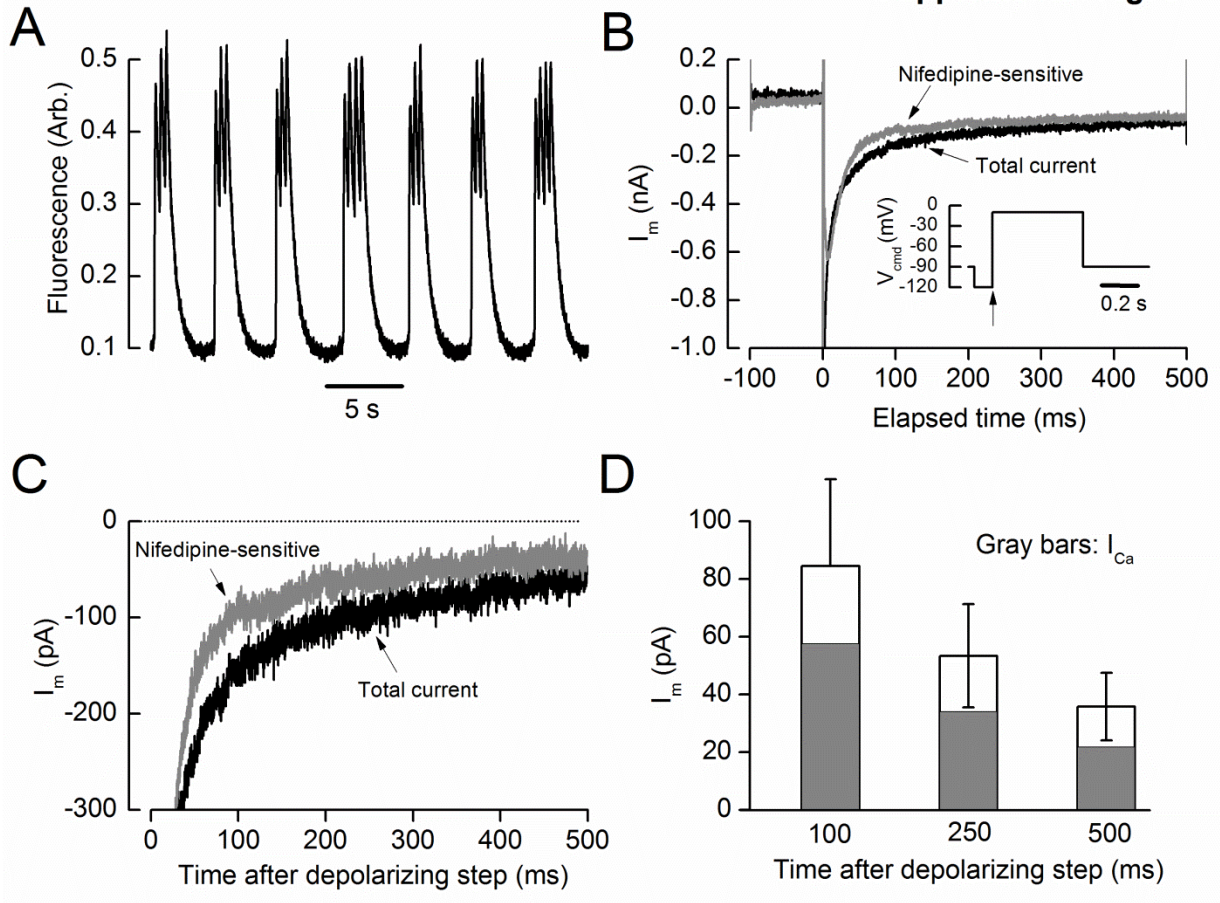

**Figure S5. Late currents recorded in LQT3 (A1) iPSC-CM: related to Figure 6.**

(A) Typical LQT3 Fluo-4 fluorescence transients (in arbitrary units) confirmed the usual prolongation phenotype before voltage-clamp (clone A1).

(B) Late currents were recorded in the same myocyte as (A) by applying the voltage command ( $V_{cmd}$ ) shown in the inset (the arrow points to the step depolarization at time zero in the main figure). The time base was adjusted to make this point zero in subsequent panels. Plotted are the total current, sensitive to 50  $\mu$ M TTX plus 2  $\mu$ M nifedipine (black trace), and the nifedipine-sensitive current (gray trace).

(C) Late currents from (B) are displayed on a more sensitive scale. Since TTX-sensitive  $I_{Na}$  is represented by the difference between the two traces, the major component was nifedipine-sensitive  $I_{Ca}$ .

(D) Late currents were measured at increasing times (100, 250, and 500 ms) after the depolarizing pulse (applied at time zero). Late  $I_{Na}$  was, respectively 32%, 36%, and 39% of the total current (N=4). Total late current density (at 100 ms) was 0.86% of peak  $I_{Na}$ , and late  $I_{Na}$  was 0.28% of peak, in reasonable agreement with a recent estimate (Terrenoire et al., 2013). Error bars: standard error of mean (SEM).



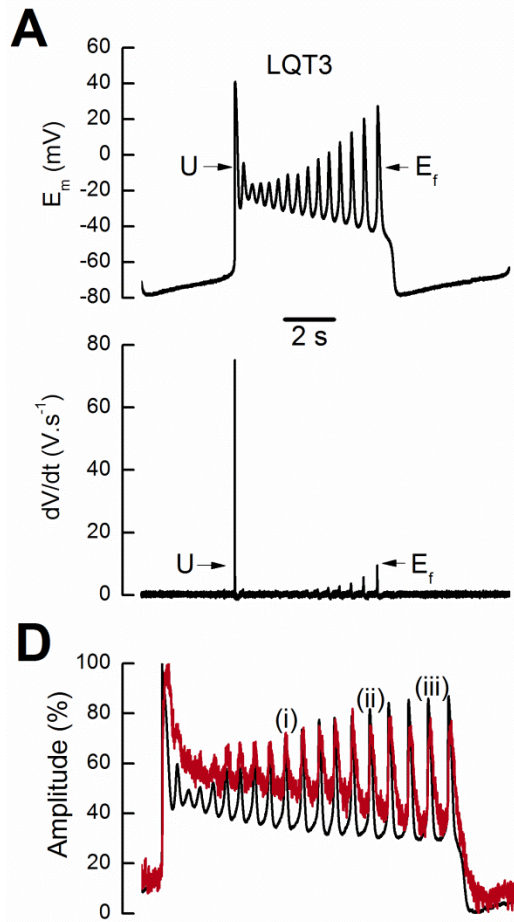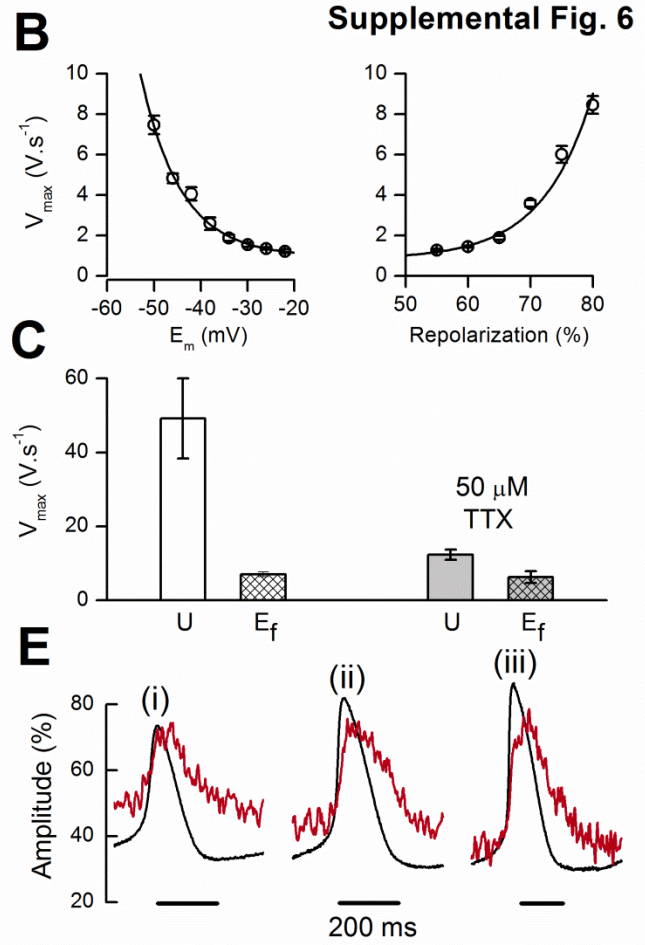

**Figure S6. Relationships between  $E_m$  and  $[Ca^{2+}]_i$  transients during EADs in LQT3 iPS-CM: related to Figure 6.**

(A) LQT3 (A3) AP ( $E_m$ , upper panel) and the calculated differential of voltage (lower panel). The labels U and  $E_f$  refer to the initial AP upstroke and final EAD closest to terminal repolarization, respectively.

(B) Left: For many EADs, peak  $dV/dt$  ( $V_{max}$ ) in EADs is plotted against the take-off potential binned at 4-mV intervals ( $N = 14$  LQT3 (A3) microclusters). Right:  $V_{max}$  data from the left panel plotted against the binned degree of repolarization (%) at the take-off potential. In both panels, fits are a single exponential. Though  $V_{max}$  increased with repolarization voltage, it remained  $<10$  V/s.

(C) Histogram showing mean  $V_{max}$  for the AP upstroke (U) and for  $E_f$ , compared before and during exposure to 50  $\mu$ M TTX ( $N = 6$  LQT3 (A3) microclusters).  $V_{max}$  in EADs was TTX-insensitive and similar in magnitude to AP upstrokes recorded in TTX, indicating that most  $Na^+$  channels were closed during the EADs. Error bars: standard error of mean (SEM).

(D) Overlay of a representative AP and  $[Ca^{2+}]_i$  transient normalized to maximum and minimum levels during the sweep. Every EAD evoked a  $[Ca^{2+}]_i$  transient.

(E) The numbered EADs shown in (D) can be observed to decay ahead of the associated  $[Ca^{2+}]_i$  transients, implying that the  $I_{Ca}$  was terminated by  $Ca^{2+}$ -dependent inactivation due to  $Ca^{2+}$  ions released from the SR into the restricted subsarcolemmal space (Brette et al., 2004; Grandi et al., 2010; Trafford et al., 1995; Weber et al., 2002).

Supplemental Fig. 7

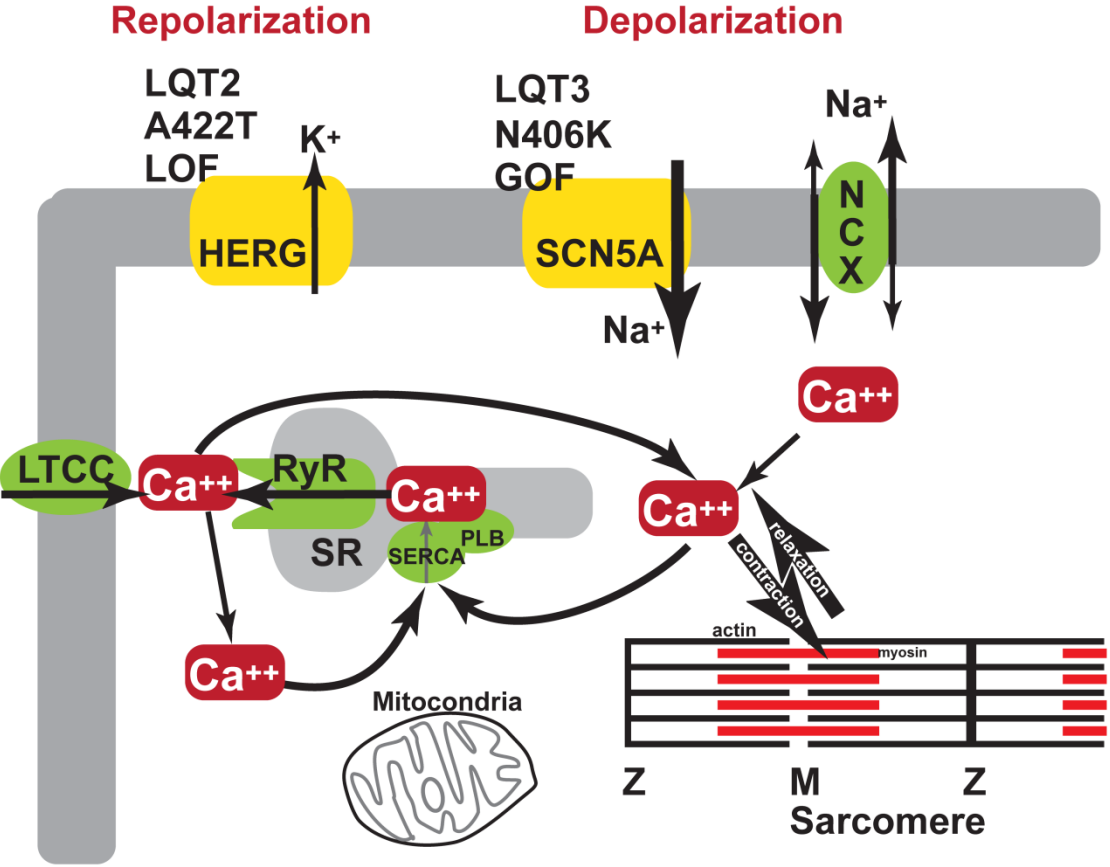

**Figure S7. Conceptual model of the effects of LQTS mutations in cardiomyocytes:**

**related to Discussion.** The labeled ion channels and transporters are shown embedded in the sarcolemmal membrane (gray). During depolarizations, L-type  $\text{Ca}^{2+}$  channels (LTCC), admit  $\text{Ca}^{2+}$  into the subsarcolemmal space. This  $\text{Ca}^{2+}$  influx triggers SR  $\text{Ca}^{2+}$  release channels, the ryanodine receptor (RyR) channels, to open, releasing  $\text{Ca}^{2+}$  from the SR lumen and leading to a global increase in intracellular  $[\text{Ca}^{2+}]_i$  (transient). The  $[\text{Ca}^{2+}]_i$  transient inactivates LTCC, and activates myofibrillar motion and cell contractions, and also trans-sarcolemmal  $\text{Ca}^{2+}$  transport via bidirectional  $\text{Na}^+$ - $\text{Ca}^{2+}$  exchange (NCX). In NCX, three  $\text{Na}^+$  ions are transferred across the membrane in the opposite direction as a single  $\text{Ca}^{2+}$  ion; therefore, a net  $\text{Na}^+$  inward current accompanies  $\text{Ca}^{2+}$  efflux (and vice versa, depending on the membrane potential). The LQT2 A422T mutation imparts loss of function (LOF) on the HERG channel, and therefore compromises repolarization. Insufficient repolarization permits  $\text{Ca}^{2+}$ -dependent inward NCX current to prolong the depolarization (i.e., the AP), which facilitates further  $\text{Ca}^{2+}$  influx (via LTCC), thereby causing EADs that may underlie cardiac arrhythmias. In LQT3, N406K is a gain-of-function (GOF) mutation in *SCN5A*, leading to an abnormally large, mistimed, net  $\text{Na}^+$  influx. When NCX reverses (because of membrane potential) and admits  $\text{Ca}^{2+}$  into the cytosol instead of transporting it out of the cell, the amplitude of the subsequent  $[\text{Ca}^{2+}]_i$  transient increases, prolonging the depolarizing phase via increased  $\text{Ca}^{2+}$  efflux once the membrane potential reverts NCX back to its normal state. This results, ultimately, in an electrophysiological phenotype equivalent to that of LQT2.

**Table S1. Pooled action potential parameters measured from control, LQT2 and LQT3 iPS-CM clusters: related to Figure 6.**

| Genotype       | $V_{\max}$ (V/s) | MDP (mV)    | OSP (mV)    | APD <sub>90</sub> (ms)         |
|----------------|------------------|-------------|-------------|--------------------------------|
| Control (N=21) | 65.9 ± 8.7       | -73.2 ± 0.8 | +39.5 ± 1.9 | 588.5 ± 53.5                   |
| LQT2 (N=13)    | 31.6 ± 5.0       | -79.0 ± 2.3 | +41.6 ± 3.3 | 4627.0 ± 926.3 <sup>***</sup>  |
| LQT3 (N= 31)   | 43.6 ± 4.9       | -83.2 ± 1.1 | +33.9 ± 1.3 | 6153.6 ± 1437.6 <sup>***</sup> |

**Table S1.** Parameters:  $V_{\max}$ , maximum depolarization rate of AP upstroke; MDP, maximal (most negative) diastolic  $E_m$  between APs; OSP, overshoot potential or action potential peak voltage; APD<sub>90</sub>, action potential duration at 90% repolarization. Pooled values from whole-cell and perforated patch clamp were derived by averaging over multiple successive APs in each microcluster. \*\*\* =  $p < 0.001$  relative to control.



## **Supplemental Movie Commentary**

Videomicrograph of an unpatched large microcluster of LQT3 iPS-CMs beating spontaneously. Superimposed on the video is a software-generated contrast-edge motion detector, the signal from which (generated by LabView processing of the AVI file) is shown in the graph at the bottom. The beating rhythm is bimodal, with twitches originating at a low frequency but consisting of many higher-frequency EADs. Recording at 30 fps. Playback at 60 fps.

## **Supplemental Experimental Procedures**

### **Reprogramming Fibroblasts into iPS Cells**

Cell lines established using dermal fibroblasts sampled from the LQTS patients and control subjects are deposited at the Coriell Institute for Medical Research

(<http://ccr.coriell.org/>). The reprogrammed iPS cells were maintained under feeder-free conditions on Matrigel in mTeSR1 medium (Stemcell Technologies, 05850).

Differentiation was performed by modifying reported protocols (Bajpai et al., 2008; Kitamoto et al., 2009; Nakamura et al., 2009; Zhang et al., 2012). The LQT mutations were confirmed and retroviral reprogramming generated multiple iPS cell lines (Figure S1C). Two iPS lines for each genotype were studied further. These cells demonstrated silencing of exogenous reprogramming genes, pluripotent marker expression (Figure S1B), a normal karyotype (Figure S1D), and the capacity to differentiate into all three embryonic germ layers in vitro and in vivo (Figure S2A and S2C). For

immunocytochemistry, primary antibodies were: OCT3/4 (1:100) (Santa Cruz, SC-5279), SOX2 (1:100) (R&D Systems, MAB2018), NANOG (1:100) (R&D systems, AF1997), and TRA-1-81 (1:100) (Chemicon, MAB4381). Secondary antibodies were Alexa fluor 488 goat anti-mouse IgG (1:500) (Invitrogen, A-11001), Alexa fluor 488 goat anti-rabbit IgG (1:500) (Invitrogen, A11008), Alexa fluor 555 goat anti-mouse IgG (1:500) (Invitrogen, A21422), and Alexa fluor 488 goat anti-mouse IgM (1:500) (Invitrogen, A21042). Nuclei were counterstained with 1 mg/ml Hoechst 33342 (Invitrogen, H3570).

### **Differentiation of iPS cells into patient-specific cardiomyocytes**

To characterize LQTS mutations functionally, the two selected clones of iPS cells were differentiated into cardiomyocytes (iPS-CMs) using a directed differentiation method. The iPS-CMs exhibited spontaneous beating and, after fixation, stained brightly for biomarkers characteristic of cardiac cells: cardiac troponin T (cTNT), myosin heavy chain (MHC), atrial and ventricular myosin light chains (MLC2a, MLC2v), and connexin 43 (CX43) (Figure S2D). Primary antibodies were as follows: cTNT (1:200) (Thermo Scientific, MS-295-P), MHC (1:50) (Millipore, 05-833), MLC2a (1:200) (ProteinTech Group Inc. 10906-1-AP), MLC2v (1:200) (Synaptic Systems, 311 011), CX43 (1:400) (Santa Cruz, SC-101660),  $\alpha$ -fetoprotein (AFP) (1:100) (R&D Systems, MAB1368),  $\alpha$ -smooth muscle actin ( $\alpha$ SMA) (pre-diluted) (DAKO, 1A4), and  $\beta$ -III-tubulin ( $\beta$ IIIIT) (1:200) (Chemicon, CB412). The secondary antibodies were as listed above. Again, the Na<sub>v</sub>1.5-N406K and K<sub>v</sub>11.1-A422T gene mutations were reconfirmed by cDNA sequencing, and we verified that control iPS-CM lacked these mutations and also expressed appropriate biomarkers.

### **RT-PCR analysis for detecting exogenous genes**

Dermal fibroblasts, P10 undifferentiated iPS cells, and human embryonic stem cells (H9 line) were harvested in Trizol (Invitrogen) for RNA isolation. Total RNA from each sample was reverse-transcribed with Superscript III (Invitrogen, 18080044) to synthesize complementary DNA (cDNA). The primers for amplifying exogenous genes of *SOX2*, *OCT3/4*, *KLF4*, and *c-MYC* in iPS cells were used as previously described (Takahashi et al., 2007). PCR conditions were as follows: DNA denaturation at 94°C for 60 s, 36 cycles at 94°C for 10 s, 55°C–62°C for 10 s, and 72°C for 30 s, followed by a final

extension step at 72°C for 5 min. For amplifying the *SOX2* exogenous gene, 5% dimethyl sulfoxide (DMSO, Sigma) was added to enhance the reaction.

### **Sequencing of genomic and complementary DNA**

Genomic DNA was extracted from dermal fibroblasts and undifferentiated iPS cells. The primers employed for detecting the LQT2 mutations (*KCNH2* 1264G>A, *K<sub>v</sub>11.1*-A422T) in genomic DNA were as described (Splawski et al., 1998). The primers for detecting the LQT3 mutation (*SCN5A* 1218C>A, *Na<sub>v</sub>1.5*-N406K) in genomic DNA were: 5'-CCTCAGGTCCGCAGGGAAGAT-3' (sense) and 5'-GCTTTTCCTTCTCCTCGGTCT-3' (antisense). PCR conditions for these primers were DNA denaturation at 95°C for 5 min, 35 cycles of 94°C for 1 min, 58°C for 2 min, and 72°C for 2 min, followed by a final extension step at 72°C for 15 min. In addition, cDNA was synthesized from differentiated iPS-CMs. *KCNH2* primers for cDNA were: 5'-CCACCAGTGACCGTGAGAT-3' (sense) and 5'-GGCGTAGCCACACTCGGTAG-3' (antisense). The primers for the *SCN5A* mutation in cDNA were: 5'-GGGCCTTTCTTGCACTCTTC-3' (sense) and 5'-ACATCTCCAAGGAGCTACGG-3' (antisense). PCR conditions were: DNA denaturation at 95°C for 5 min, 40 cycles of 94°C for 30 s, 55°C for 30 s, and 72°C for 1 min, followed by a final extension step at 72°C for 7 min.

### **Immunocytochemistry**

The iPS cells and iPS-CMs were fixed with 4% paraformaldehyde (PFA) in PBS for 15 min at 4°C and subsequently blocked with 2% skim milk in PBS containing 0.1% Triton X-100 for 1 hr at room temperature. Primary antibodies used are listed above.

### **Bisulfite genomic sequencing for DNA methylation assay**

Bisulfite treatment was performed using the EpiTect Bisulfite Kit (Qiagen, 59110) and amplified products were cloned into pCR2.1-TOPO (Invitrogen, K451022). Randomly selected clones were sequenced with the recommended M13 forward and M13 reverse primers for each gene. Primers for the *OCT3/4* promoter regions were as previously described (Yu et al., 2009).

### **Teratomas**

After harvest by collagenase IV treatment (GIBCO, 17104019) iPS cells were resuspended in mTeSR medium containing 10  $\mu$ M ROCK inhibitor. Approximately  $10^6$  cells were injected directly into the testes of severe combined immunodeficiency (SCID) mice (Charles River, Wilmington, MA). Eight weeks after injection, tumors were fixed with 4% PFA, and twenty histological slices were cut (randomly) around the center of each teratoma. Sliced tissue was stained with hematoxylin and eosin, and examined by eye for tissue formations by a skilled pathologist. All animal-handling procedures followed the Guide for the Care and Use of Laboratory Animals published by the US National Institutes of Health (NIH Publication No. 85-23, revised 1996) and the guidelines of University of California San Francisco Animal Care and Use Committee.



## References

- Bajpai, R., Lesperance, J., Kim, M., and Terskikh, A.V. (2008). Efficient propagation of single cells Accutase-dissociated human embryonic stem cells. *Mol Reprod Dev* 75, 818-827.
- Brette, F., Salle, L., and Orchard, C.H. (2004). Differential modulation of L-type Ca<sup>2+</sup> current by SR Ca<sup>2+</sup> release at the T-tubules and surface membrane of rat ventricular myocytes. *Circ Res* 95, e1-7.
- Grandi, E., Morotti, S., Ginsburg, K.S., Severi, S., and Bers, D.M. (2010). Interplay of voltage and Ca-dependent inactivation of L-type Ca current. *Prog Biophys Mol Biol* 103, 44-50.
- Kita-Matsuo, H., Barcova, M., Prigozhina, N., Salomonis, N., Wei, K., Jacot, J.G., Nelson, B., Spiering, S., Haverslag, R., Kim, C., *et al.* (2009). Lentiviral vectors and protocols for creation of stable hESC lines for fluorescent tracking and drug resistance selection of cardiomyocytes. *PLoS One* 4, e5046.
- Nakamura, K., Salomonis, N., Tomoda, K., Yamanaka, S., and Conklin, B.R. (2009). G(i)-coupled GPCR signaling controls the formation and organization of human pluripotent colonies. *PLoS One* 4, e7780.
- Splawski, I., Shen, J., Timothy, K.W., Vincent, G.M., Lehmann, M.H., and Keating, M.T. (1998). Genomic structure of three long QT syndrome genes: KVLQT1, HERG, and KCNE1. *Genomics* 51, 86-97.
- Takahashi, K., Tanabe, K., Ohnuki, M., Narita, M., Ichisaka, T., Tomoda, K., and Yamanaka, S. (2007). Induction of pluripotent stem cells from adult human fibroblasts by defined factors. *Cell* 131, 861-872.
- Terrenoire, C., Wang, K., Chan Tung, K.W., Chung, W.K., Pass, R.H., Lu, J.T., Jean, J.C., Omari, A., Sampson, K.J., Kotton, D.N., *et al.* (2013). Induced pluripotent stem cells used to reveal drug actions in a long QT syndrome family with complex genetics. *J Gen Physiol* 141, 61-72.
- Trafford, A.W., Diaz, M.E., O'Neill, S.C., and Eisner, D.A. (1995). Comparison of subsarcolemmal and bulk calcium concentration during spontaneous calcium release in rat ventricular myocytes. *J Physiol* 488 ( Pt 3), 577-586.
- Weber, C.R., Piacentino, V., 3rd, Ginsburg, K.S., Houser, S.R., and Bers, D.M. (2002). Na(+)-Ca(2+) exchange current and submembrane [Ca(2+)] during the cardiac action potential. *Circ Res* 90, 182-189.
- Yu, J., Hu, K., Smuga-Otto, K., Tian, S., Stewart, R., Slukvin, I., and Thomson, J.A. (2009). Human induced pluripotent stem cells free of vector and transgene sequences. *Science* 324, 797-801.
- Zhang, J., Klos, M., Wilson, G.F., Herman, A.M., Lian, X., Raval, K.K., Barron, M.R., Hou, L., Soerens, A.G., Yu, J., *et al.* (2012). Extracellular matrix promotes highly efficient cardiac differentiation of human pluripotent stem cells: the matrix sandwich method. *Circ Res* 111, 1125-1136.
